1  
2  
3  
4  
5  
6  
7  
8  
9  
10  
11  
12  
13  
14  
15  
16  
17  
18  
19  
20  
21  
22  
23  
24  
25  
26  
27  
28  
29  
30

**Expression of the cancer-associated *DNA polymerase ε P286R* in fission yeast leads to translesion synthesis polymerase dependent hypermutation and defective DNA replication**

Ignacio Soriano<sup>1,2,9</sup>, Enrique Vazquez<sup>3</sup>, Nagore De Leon<sup>1,2\*</sup>, Sibyl Bertrand<sup>1\*</sup>, Ellen Heitzer<sup>4</sup>, Sophia Toumazou<sup>1,5</sup>, Claire Palles<sup>6</sup>, Chen-Chen Pai<sup>5</sup>, Timothy Humphrey<sup>5</sup>, Ian Tomlinson<sup>2</sup>, Sue Cotterill<sup>7</sup>, Stephen E. Kearsey<sup>1,8</sup>

<sup>1</sup>ZRAB, University of Oxford, 11a Mansfield Rd, Oxford, OX1 3SZ, UK.

<sup>2</sup>The Institute of Genetics and Cancer, University of Edinburgh, Western General Hospital Crewe Road, Edinburgh EH4 2XU, UK.

<sup>3</sup>Vascular Pathophysiology Department, Centro Nacional de Investigaciones Cardiovasculares (CNIC), 28029 Madrid, Spain.

<sup>4</sup>Institute of Human Genetics, Diagnostic & Research Center for Molecular BioMedicine, Medical University of Graz, Neue Stiftingtalstrasse 6, 8010 Graz, Austria.

<sup>5</sup>CRUK-MRC Oxford Institute for Radiation Oncology, Department of Oncology, University of Oxford, ORCRB, Roosevelt Drive, Oxford, OX3 7DQ, UK.

<sup>6</sup>Gastrointestinal Cancer Genetics Laboratory, Institute of Cancer and Genomic Sciences, College of Medical and Dental Sciences, University of Birmingham, Birmingham B15 2TT, UK

<sup>7</sup>St. George's, University of London, Cranmer Terrace, Tooting, London SW17 0RE.

<sup>8</sup>Corresponding author ([stephen.kearsey@zoo.ox.ac.uk](mailto:stephen.kearsey@zoo.ox.ac.uk))

<sup>9</sup>Co-Corresponding author ([ignacio.soriano@igmm.ed.ac.uk](mailto:ignacio.soriano@igmm.ed.ac.uk))

\* Equal contribution

Short title: Analysis of Pol ε P286R hypermutation in fission yeast

Version 230321

31 **ABSTRACT**

32 Somatic mutations in the proofreading domain of the replicative DNA polymerase  $\epsilon$  (*POLE*-  
33 exonuclease domain mutations, *POLE*-EDMs) are frequently found in colorectal and endometrial  
34 cancers and, occasionally, in other tumours. *POLE*-associated cancers typically display hypermutation,  
35 microsatellite stability and a unique mutational signature, with a predominance of C > A transversions  
36 in the context TCT. To understand better the contribution of hypermutagenesis to tumour  
37 development, we have modelled the most recurrent *POLE*-EDM (*POLE*-P286R) in *Schizosaccharomyces*  
38 *pombe*. Whole-genome sequencing analysis revealed that the corresponding *pol2*-P287R allele also  
39 has a strong mutator effect in vivo, with a high frequency of base substitutions and relatively few  
40 frameshift mutations. The mutations are equally distributed across different genomic regions, but  
41 they occur within an AT-rich context. The most abundant base-pair changes are TCT > TAT  
42 transversions and, in contrast to human mutations, TCG > TIG transitions are not elevated, likely due  
43 to the absence of cytosine methylation in fission yeast. The *pol2*-P287R variant has an increased  
44 sensitivity to elevated dNTP levels and DNA damaging agents, and shows reduced viability on  
45 depletion of the Pfh1 helicase. In addition, S phase is aberrant and RPA foci are elevated, suggestive  
46 of persistent ssDNA or DNA damage, and the *pol2*-P287R mutation is synthetically lethal with *rad3*  
47 inactivation, indicative of checkpoint activation. Significantly, deletion of genes encoding some  
48 translesion synthesis polymerases, most notably Pol  $\kappa$ , partially suppresses *pol2*-P287R  
49 hypermutation, indicating that polymerase switching contributes to this phenotype.

50

51

52 **AUTHOR SUMMARY**

53

54 Cancer is a genetic disease caused by mutations that lead to uncontrolled cell proliferation and other  
55 tumour properties. Defects in DNA repair or replication can lead to cancer development by increasing  
56 the likelihood that cancer-causing mutations will happen. Here we look at a pathogenic variant of a  
57 polymerase involved in genome replication (DNA polymerase  $\epsilon$  POLE-P286R). This variant is  
58 associated with highly mutated cancer genomes. By introducing this mutation into the polymerase  $\epsilon$   
59 gene of a model organism, fission yeast, we show that it causes a large increase in single base  
60 substitutions, scattered throughout the genome. The sequence context of mutations is similar in  
61 fission yeast and humans, suggesting that the yeast model is useful for understanding how POLE-  
62 P286R causes such a high mutation rate. Yeast POLE-P286R cells show slow chromosome replication,  
63 suggesting that the polymerase has difficulty in copying certain chromosomal regions. Yeast POLE-  
64 P286R cells become inviable when the concentration of dNTP building blocks for DNA synthesis is  
65 increased, probably because the mutation rate is pushed to an intolerable level. Interestingly, we find  
66 that specialised polymerases that are tolerant of DNA damage contribute to the high mutation rate  
67 caused by POLE-P286R. These findings have implications for the therapy of POLE-P286R tumours.

68

## 69 INTRODUCTION

70 In eukaryotes, nuclear DNA replication is carried out by three members of the B-family of DNA  
71 polymerases (Pols), Pols  $\alpha$ ,  $\delta$  and  $\epsilon$ , which function cooperatively to guarantee accurate and efficient  
72 genome duplication. Pol  $\alpha$  synthesizes the primer to initiate DNA replication, allowing Pol  $\epsilon$  and Pol  $\delta$   
73 to take over leading and lagging strand synthesis, respectively. Unlike Pol  $\alpha$ , Pols  $\epsilon$  and  $\delta$  display high  
74 processivity and fidelity, being the only nuclear polymerases with functional 3'-5' exonuclease activity  
75 capable of correcting mistakes made during DNA synthesis [1, 2].

76

77 Pol  $\epsilon$  is a large, four-subunit protein with critical roles in DNA replication and repair, cell cycle control  
78 and epigenetic inheritance (reviewed in [3]). In contrast to Pol  $\delta$ , Pol  $\epsilon$  is a highly processive enzyme  
79 even in the absence of accessory factors [4-6], and is perhaps the most accurate eukaryotic DNA  
80 polymerase [7, 8]. The high intrinsic processivity is due to the presence of a small domain in the  
81 catalytic subunit (Pol2) that allows Pol  $\epsilon$  to encircle the nascent dsDNA [6, 9]. Another unique feature  
82 of Pol2 is the presence of a tyrosine (Y431 in *S. cerevisiae*) in the major groove of the nascent base-  
83 pair binding pocket, which may contribute to the fidelity of polymerisation [9].

84

85 Proofreading increases Pol  $\epsilon$  replication accuracy by  $\sim$ 100-fold [7] and has an essential role in the  
86 maintenance of genomic stability. Mutations inactivating the exonuclease activity of Pol  $\epsilon$  cause an  
87 increased mutation rate in both yeast [10] and mice, and lead to murine tumours in tissues with a high  
88 rate of cell turnover [11]. Recently, these findings were shown to be relevant to human cancer from  
89 large-scale studies of colorectal (CRC) and endometrial cancers (EC) [12-15]. This analysis revealed a  
90 subset of hypermutated microsatellite-stable (MSS) tumours with heterozygous somatic mutations in  
91 the exonuclease domain of Pol  $\epsilon$ . A further study of sporadic ECs showed that somatic *Pol*  $\epsilon$   
92 exonuclease domain mutations (*POLE* EDMs) were present in about 7% of cases [16]. Subsequently,  
93 several thousand colorectal and endometrial tumour samples have been analysed, reporting more  
94 than 10 different *POLE* driver mutations [17, 18]. Current data suggest that somatic *POLE* proofreading  
95 domain mutations are present in 1-2% of CRCs and 7-12% of ECs, and less commonly in hypermutated  
96 tumours of the brain, pancreas, ovary, breast, stomach, lung and prostate [18, 19]. The most striking  
97 molecular characteristic in tumours harbouring many somatic *POLE* EDMs is their very high mutation  
98 rate, often exceeding 100 mutations/Mb. These mutations are predominantly single base  
99 substitutions and define a characteristic mutational pattern with a high proportion of C > A  
100 transversions in the context TCT, C > T transitions in the context TCG and T > G transversions in the  
101 context TTT, corresponding to COSMIC signatures 10 SBS10a and SBS10b [16, 20-22].

102

103 The amino-acids substituted in somatic *POLE* EDMs show a variable incidence rate (reviewed in [18,  
104 19]), with *POLE-P286R* being the most frequent variant in colorectal and endometrial cancer [16, 21,  
105 23], reaching a frequency of ~7% in early-onset colorectal cancer [24]. Heterozygous *Pole-P286R* mice  
106 develop malignant tumours of diverse lineages, which show very high mutation rates in the range of  
107 human malignancies [25]. This exceptional mutator phenotype presumably leads to a greater cancer  
108 risk due to mutations in driver genes, explaining the frequent occurrence of this variant in cancers.

109

110 The equivalent substitution (*pol2-P301R*) has been functionally validated in *S. cerevisiae*, showing an  
111 unusually strong mutator effect, and even in the heterozygous state the mutator effect is comparable  
112 with complete MMR deficiency [23]. Interestingly, budding yeast expressing *pol2-P301R* shows a  
113 mutation rate far higher than that of the exonuclease inactive variant (*Pol ε* exonull), suggesting that  
114 P286R must be able to increase the mutation rate through other processes other than proofreading  
115 deficiency alone [23, 26]. Curiously, the mutation rate of *Pol2-P301R in vitro* is less than that of *Pol ε*  
116 exonull, and is reported to have increased polymerase activity with the ability to extend mismatched  
117 primer termini. It is possible that this phenotype may result from the P286R mutation blocking the  
118 nascent DNA terminus from switching to the exonuclease site [27]. Nevertheless, the *S. cerevisiae*  
119 *pol2-P301R* holoenzyme still shows some exonuclease activity [26], while the human enzyme has been  
120 reported to have none [21].

121

122 Defects in polymerases may lead to increases in mutation rates by several mechanisms. In *S.*  
123 *cerevisiae*, an exonuclease null *Pol δ* mutant activates mutagenic repair via a checkpoint pathway that  
124 elevates dNTP levels, and this may be more important for accumulation of mutations than the  
125 proofreading defect *per se* [28]. The mechanism behind the mutator phenotype of the colon-cancer  
126 associated variant *POLD1-R689W* is similar in that yeast cells expressing *Pol3-R696W* (equivalent to  
127 *POLD1-R689W*) show a checkpoint-dependent increase in dNTP levels, similar to that seen with  
128 proofreading defective mutants [29]. This elevation of dNTP pools further increases the rate of *Pol δ*  
129 errors, thus forming a vicious circle and a similar mechanism has been suggested to explain the  
130 mutator phenotype due to error-prone DNA polymerase  $\epsilon$  variants [30]. However it remains unknown  
131 whether dNTP pool levels are elevated in response to cancer-associated *Pol ε* variants.

132

133 An additional mechanism linking polymerase defects to an increased mutation rate involves  
134 translesion synthesis (TLS) polymerases. In *S. pombe*, *Pol κ*, and *Pol ζ* to a lesser extent, contribute  
135 significantly to the mutator phenotype of a strain expressing defective *Pol α* [31]. This study suggests  
136 that TLS polymerases are recruited in response to replication fork stalling or collapse, restarting

137 synthesis at the cost of an increased replicative mutation rate. However, Pol  $\zeta$  is not responsible for  
138 the P286R hypermutation phenotype in *S. cerevisiae* [26].

139

140 In this study, we have characterized the impact of the P286R variant on genome-wide mutation and S  
141 phase execution in the fission yeast *Schizosaccharomyces pombe*. Furthermore, we studied the effect  
142 of increasing the mutation frequency in the viability of cells with high mutational burden. Finally, we  
143 addressed the contribution of TLS polymerases to hypermutation.

## 144 RESULTS

### 145 *Fission yeast mimic of POLE-P286R has a strong mutator phenotype*

146 P286 is invariant in all Pol  $\epsilon$  orthologues, and is also conserved in Pol  $\delta$ , T4 and RB69 bacteriophage  
147 polymerases (Fig. 1A). A fission yeast mimic of *POLE-P286R* (*pol2-P287R*) and an exonuclease deficient  
148 variant (*pol2-D276A/E278A*, [32] [33]) were constructed and *in vivo* mutation rates were measured by  
149 fluctuation analysis. Introduction of these mutations did not affect the steady state levels of the  
150 protein (Supplementary Fig. S1). The *Pol2-P287R* variant is also hypermutagenic in fission yeast, with  
151 a rate of mutation that is about 70 times higher than wild type and about 10-fold higher than the  
152 catalytically dead mutant (Fig. 1B), supporting the hypothesis that this change results in defects  
153 substantially more severe than loss of proofreading. Interestingly, mutation of the equivalent proline  
154 to arginine (P311R) in *S. pombe* Pol  $\delta$  (*Pol3/Cdc6*) did not result in a hypermutating phenotype (Fig.  
155 1B), possibly reflecting the different roles of Pol  $\epsilon$  and Pol  $\delta$  as leading and lagging strand polymerases.

156 To analyse further the rate and the spectrum of mutations, we undertook a ~200-generation mutation  
157 accumulation (MA) experiment followed by deep sequencing of genomic DNA from wild-type and  
158 mutant cells. On average, we identified 0.5, 9.5 and 394 single-base substitutions in the wild-type,  
159 *pol2-D276A/E278A* and *pol2-P287R* strains, respectively (Fig. 1C). Consistent with the fluctuation  
160 assay data, *pol2-P287R* cells have the highest rate of mutation, exceeding that of *pol2-D276A/E278A*  
161 mutant by more than 40 times (Fig. 1C). In addition, this hypermutator variant displayed a relative  
162 absence of indels (Fig. 1C), consonant with the microsatellite-stable (MSS) phenotype of *POLE* EDM  
163 tumours [16]. There was no genomic region particularly prone to P287R-induced mutations, which  
164 were equally distributed across the genome (Fig. 1D).

165 *Fission yeast mutations induced by pol2-P287R broadly recapitulate mutations seen POLE-P286R*  
166 *cancer genomes*

167 We next wished to compare the mutation spectra occurring in *POLE-P286R* human cancers and the  
168 equivalent mutant in fission yeast. First, we analysed whole-exome sequencing data from the TCGA  
169 colorectal and endometrial tumours harbouring the P286R variant. As expected, both groups of  
170 samples displayed very similar patterns, typified by C > A transversions in the context TCT, C > T  
171 transitions in the context TCG and T > G transversions in the context TTT (Fig. 2A), which is in  
172 accordance with the specific mutational spectrum of *POLE* EDMs [16, 20, 21].

173 We then compared the pattern of *pol2-P287R* mutations to the human spectra (Fig 2A, 2B upper  
174 panel). In consonance with human cancers, the most abundant mutations are C > A transversions in  
175 which the mutated cytosine is in the context TCT, although not to the same proportion as in the  
176 tumour genomes (Fig. 2A, B). In addition, the *pol2-P287R* cells recapitulate the most discriminating  
177 genomic alterations for human *POLE* mutations: CG to AT  $\geq$  20%; TA to GC  $\geq$  4%; CG to GC  $\leq$  0.6% [34].  
178 More precisely, *pol2-P287R* cells present values of 33%, 15%, and 0% respectively (Fig. 2B and  
179 Supplementary Fig. S2). However, the lack of TCG > TIG transitions in the *pol2-P287R* spectrum is  
180 noteworthy. In humans, C > T transitions in a CpG base context are probably due to the deamination  
181 of 5-methylcytosine to thymine [35, 36] and/or mutant *POLE* synthesis across methylated cytosines  
182 situated on the leading strand [37], and the absence of 5-methylcytosine in fission yeast may explain  
183 these differences. Overall, these data suggest that fission yeast expressing P287R is a useful model for  
184 the human mutation.

185 Genome-wide estimates of mutation rates and mutational spectrum of wild-type *S. pombe* have been  
186 recently published [38, 39]. We used the base-substitution mutations from both studies to generate  
187 the mutational spectrum of the wild-type strain and we then compared it with the percentage of base  
188 substitutions identified in *pol2-P287R* cells (Fig. 2B). We found a prominent enrichment of C > A  
189 transversions in an NCT context and T > G transversions in an NTT context in the *pol2-P287R* mutant.  
190 In contrast, C > G transversions occurred with increased frequency in the wild-type cells, being  
191 completely absent in the mutant strain (Fig. 2B). This indicates that the Pol2-P287R polymerase is not  
192 simply amplifying the pattern of mutations found in wild-type cells.

### 193 *Sequence-context determinants affect mutation rate variability*

194 To establish if mutations are generated in preferred nucleotide contexts, we aligned 103 bp long  
195 sequences, encompassing the trinucleotides harbouring the mutations and their 50 bp flanking  
196 regions, and determined the nucleotide frequency for each position relative to the centre of the  
197 alignment in both the wild-type and *pol2-P287R* cells. Figure 2C showed a 10-12 bp long region  
198 flanking the mutations in the case of the *pol2-P287R* strain (top right panel), with strong asymmetry

199 in the frequency of adenine (A) and thymine (T) in the same DNA strand relative to the mismatch  
200 position. This asymmetric bias is absent in the region flanking wild-type mutations (top left panel). As  
201 a control, alignment of randomly selected 103 bp sequences along the *S. pombe* genome generated  
202 flat profiles, in which the nucleotide composition coincided with the average genome content (Fig 2C,  
203 bottom panels).

204 Given the AT-richness in the vicinity of *pol2*-P287 induced mutations, we looked at AT-rich regions in  
205 general to see to see if this sequence context is a factor in mutational probability in yeast and human  
206 genomes. Our results indicated that around 50% of these mutations are embedded in sequences 9-50  
207 bp long with an AT-enrichment  $\geq 80\%$  both in the fission yeast *pol2*-P287R mutant and P286R cancers  
208 (Fig. 2D). However, differences were found in regions over 50 bp (AT  $\geq 80\%$ ), with 14 and 2.6% of TCT  
209 > TAT transversions in yeast and human respectively (Fig. 2D), likely caused by the higher AT-content  
210 of the *S. pombe* genome [40]. Non-mutated TCT did not show this bias towards AT-rich environments  
211 (Supplementary Fig. S3). Overall, this suggests that the mutagenic mechanism due to *pol2*-P287R is  
212 distinct from that seen in wild-type cells.

### 213 *Similarities between pol2-P287R mutational patterns and COSMIC signatures*

214 To compare the mutational consequences of the human and yeast POLE286R variant, we first  
215 generated the mutational patterns of the wild-type and *pol2*-P287R strains and corrected for the  
216 difference in trinucleotide frequencies in the *S. pombe* genome and the human exome (Fig. 3A), as  
217 described in [41]. Then, to assess if any of the mutational patterns determined in this study could be  
218 related to one of the COSMIC mutational signatures, a cosine heatmap was generated using the  
219 MutationalPatterns package [42]. A cosine similarity of 0.80 was considered a threshold for “high”  
220 similarity [41]. The *pol2*-P287R strain showed the highest similarity of 0.85 to the signature 14 (Fig. 3B  
221 and Supplementary Table S3). Signature 14 was previously established as linked with concurrent *POLE*  
222 EDM and defective MMR. The wild-type strain did not exhibit any cosine coefficient over the  
223 threshold, displaying a highest similarity of 0.72 to COSMIC signature 40 (Fig. 3B and Suppl. Table S3).  
224 This is currently a signature of unknown aetiology, although numbers of mutations attributed to it are  
225 correlated with patients’ ages for some types of human cancer. Moreover, these data indicate that  
226 the signature 10 associated with *POLE* EDMs in human cancers is not the most prevalent mutational  
227 pattern detected in the *pol2*-P287R strain. This may suggest that the mutational process in *S. pombe*  
228 *pol2*-P287R does not fully represent the situation in human cells. However it should be borne in mind  
229 that human cancer cells are heterozygous for the *POLE*-P286R mutation, while the *pol2*-P287R



230 mutation accumulation experiment used a haploid strain, so the mutagenic burden on mismatch  
231 repair would have been greater in the yeast strain.

### 232 *pol2-P287R cells exhibit increased sensitivity to DNA-damaging agents*

233 Cells with a high rate of spontaneous mutations frequently display increased sensitivity to DNA-  
234 damaging agents [43, 44]. Furthermore, Pol  $\epsilon$  is implicated in various repair pathways [3]. To gain  
235 further insight into this relationship, we performed spot assay analyses in the presence of different  
236 mutagenic agents. Results showed that *pol2-P287R* cells are very sensitive to agents inducing DNA  
237 breaks, such as bleocin, or nucleotide modification, such as MMS, 4-NQO, UV radiation, but not to HU,  
238 a ribonucleotide reductase inhibitor (Fig. 4A). In fact, *pol2-P287R* cells showed some resistance to HU.  
239 The sensitivity to MMS is particularly dramatic and maybe due to the fact that, at the concentrations  
240 used, this alkylating agent generates 25 and 50-fold more lesions than 4-NQO and bleocin, respectively  
241 [45]. The sensitivity of *pol2-P287R* to DNA damaging agents is seen with several independently  
242 derived strains, so it is unlikely that this phenotype is due to second-site mutations facilitated by the  
243 strain's hypermutation. Given the sensitivity to a wide range of DNA damaging agents, it is possible  
244 that Pol2-P287R compromises the ability of the replication fork to cope with damaged template,  
245 rather than an effect on a specific repair pathway.

### 246 *Increased dNTP levels lead to lethality in pol2-P287R cells*

247 As described above, *pol2-P287R* cells exhibit slight resistance to HU (Fig. 4A), suggesting that this  
248 mutant could have increased dNTP pools under normal conditions. Increased dNTP levels can elevate  
249 the mutation rate and, in combination with genetic alterations affecting DNA polymerase nucleotide  
250 selectivity, proofreading activity, or MMR, cause enhanced mutator phenotype ([29, 30, 46] reviewed  
251 in [47]). However, the *pol2-P287R* strain showed similar levels of dNTPs to wild-type and *pol2-exonull*  
252 cells (Fig. 4B), indicating that dNTP alterations are not contributing to its hypermutagenic phenotype.

253 Increased dNTP levels are detrimental to the fidelity of DNA replication in bacteria, yeast and  
254 mammalian cells (reviewed in [47]). This effect might be exacerbated in the case of the error-prone  
255 Pol2-P287R variant. To address this possibility, we crossed a *cdc22-D57N* strain, where dNTP levels  
256 are enhanced due to inactivation of ribonucleotide reductase allosteric regulation, with the  
257 exonuclease-deficient *pol2-D276A/E278A* and *pol2-P287R* mutants and analysed the progeny by  
258 tetrad dissection. Double *pol2-D276A/E278A cdc22-D57N* mutants were readily obtained but the  
259 double *pol2-P287R cdc22-D57N* were not, implying synthetic lethality (Fig. 4C). The mutation burden  
260 of the *pol2-P287R* strain could be near the limit of the 'error-induced extinction', and an increase in

261 the mutation frequency caused by raised dNTP levels may be sufficient to dramatically decrease the  
262 fitness of these cells, but this is tolerated in the *pol2-D276A/E278A* control, which has a lower  
263 mutation rate.

#### 264 *The pol2-P287R mutation causes S phase defects and is dependent on Rad3 for viability*

265 We noticed that a proportion of *pol2-P287R* cells were elongated (Supplementary Fig. S4), and the  
266 doubling time of the strain is longer than wild-type or exonull strains (Fig. 5A), suggesting that  
267 problems with S phase might lead to a mitotic delay via checkpoint activation. To investigate this in  
268 more detail, cells were arrested in G1 by nitrogen starvation, released from the block and flow  
269 cytometry was used to follow the progress of S phase. This showed a slower completion of S phase in  
270 the *pol2-P287R* strain (Fig. 5B) compared to wild-type cells, while the wild-type and exonull strains  
271 showed similar S phase kinetics. To examine S phase execution by a different method, we pulsed cells  
272 with EdU for 15 minutes and measured the length of replication tracts by DNA combing (Fig 5C,D). The  
273 *pol2-P287R* cells showed shorter incorporation tracks, suggesting that fork progression is slower, or  
274 fork stalling is more frequent.

275 To determine if the Rad3 checkpoint kinase is required for viability of the *pol2-P287R* cells, we made  
276 double mutants with a temperature-sensitive *rad3ts* allele. While the exonuclease null double mutant  
277 was viable at the restrictive temperature, the *pol2-P287R* double mutant was not (Fig. 5E). We also  
278 found that foci of Rad11-GFP, a subunit of RPA, were more common in *pol2-P287R* cells compared to  
279 wild-type and exonull strains, suggesting that single-stranded DNA and perhaps DNA damage may  
280 result from replication by the mutant polymerase (Fig. 5F, Supplementary Fig. S5). Consistent with  
281 these observations, we observed a low level of Chk1 and Cds1 phosphorylation in the *pol2-P287R*  
282 mutant (Fig 5G, H). Taken together, these observations suggest that a slower, defective S phase and  
283 accumulation of single-stranded DNA results from replication by Pol2-P287R, resulting in partial  
284 activation of the DNA damage and replication checkpoints.

#### 285 *Genetic interaction with Pfh1 helicase*

286 Given our observations that Pol2-P287R results in a defective S phase, we investigated whether there  
287 is a genetic interaction with Pif1/Pfh1 helicase, since this enzyme is involved in replicating through  
288 template barriers such as transcription complexes [48-50]. In *S. pombe*, Pfh1 has an essential role in  
289 the maintenance of both nuclear and mitochondrial DNA [51]. Therefore, to study its genetic  
290 interaction with the exonuclease variants, we made double mutants of *pol2-P287R* with a conditional  
291 allele of *pfh1* (*nmt1-81Xpfh1-GFP*), where the gene is under the control of a weak promoter that is

292 down-regulated by thiamine [51]. In the absence of thiamine, Pfh1 is localized to the nucleus and  
293 mitochondria (Fig 6, top panels) and all the strains grew well at 26°, 30° and 36° C (Fig. 7B, top panels).  
294 The nuclear signal is dramatically reduced in the presence of thiamine (Fig 7A, bottom panels). The  
295 growth of the *pol2-D276A/E278A nmt1-81Xpfh1-GFP* double mutant strain was similar to wild-type,  
296 when *pfh1-GFP* was repressed. However, *pol2-P287R nmt1-81Xpfh1-GFP* cells were very sick  
297 suggesting a strong genetic interaction with *pfh1* (Fig. 7B).

298 It has been recently found that Pfh1 overexpression is able to rescue some replication defects in fission  
299 yeast [52]. We wondered whether Pol2-P287R defects could be partially alleviated by overexpressing  
300 this helicase. *pol2-287R* cells were transformed with pREP1 plasmid expressing Pfh1 DNA helicase  
301 under the control of the full strength (3X) *nmt1* promoter and spot assays were performed. Results  
302 indicated that overexpression of Pfh1 largely suppresses some defective phenotypes of *pol2-P287R*  
303 mutant cells, such as the growth defects at 30° C in minimal medium and the sensitivity to MMS (Fig.  
304 7C). However, the 4-NQO sensitivity was not rescued by the overexpression of the helicase. Overall,  
305 these results suggest that the replisome in *pol2-P287R* cells may have difficulty in dealing with ‘hard-  
306 to-replicate’ template particularly if Pfh1 levels are low, but enhanced Pfh1 activity may to some  
307 extent compensate for *pol2-P287R* defects.

#### 308 *Pol κ deletion suppresses the hypermutagenic phenotype*

309 In contrast to its strong mutator effect *in vivo*, it has been shown in *S. cerevisiae* that P286R does not  
310 have a high error rate *in vitro* [26]. We hypothesized that as a consequence of the failed proofreading  
311 caused by the *pol2-P287R* mutation, replication fork stalling might increase and TLS polymerases could  
312 be recruited onto chromatin, to extend mismatched primer terminus, resulting in mutagenic synthesis  
313 [31]. We analysed the mutation rates of different TLS polymerase mutants containing a deletion of  
314 *rev1*, *rev3* (the catalytic domain of Pol ζ) or *kpa1* (Pol κ), or a single point mutation in *eso1* (*eso1-*  
315 *D147N*) inactivating Pol η, individually and in combination with *pol2-P287R*. Canavanine fluctuation  
316 assays showed that deletion of *rev3* in *pol2-P287R* cells did not significantly change the error rate (Fig.  
317 7A), consistent with data from *S. cerevisiae* [26]. In the case of *rev1Δ pol2-P287R* and *eso1-D147N*  
318 *pol2-P287R* double mutants, the error rate was partially decreased (Fig. 7A). Strikingly, *kpa1* deletion  
319 reduced the mutation rate of *pol2-P287R* to a level similar to an exonuclease deficient mutant,  
320 suggesting that this polymerase contributes to mutagenesis in cells expressing Pol2-P287R.

321 To confirm this result, we performed a ~200-generation mutation accumulation (MA) experiment  
322 followed by deep sequencing of genomic DNA from *kpa1Δ* and *eso1-D147N* single and double  
323 mutants. Sequencing data showed a reduction of around 4-fold in the number of mutations

324 accumulated in the absence of Pol  $\eta$  activity compared to the single *pol2-P287R* mutant. In accordance  
325 with the fluctuation rate assays, *kpa1 $\Delta$*  caused a stronger reduction in the mutation burden, with a  
326 15-fold decrease in the number of mutations accumulated the *kpa1 $\Delta$  pol2-P287R* double mutant (Fig.  
327 7B). Overall, these results suggest that an important feature of hypermutation caused by the *pol2-*  
328 *P287R* variant is polymerase switching to TLS polymerases.

329

## 330 **DISCUSSION**

331

332 Defects in DNA replication have long been suggested to have a causative role in human cancer, but  
333 specific examples have only recently emerged. Recently, several studies show that  
334 somatic *POLE* proofreading domain mutations occur in sporadic ECs, CRCs and several other cancers  
335 (reviewed in [18, 19]) The *POLE* EDMs are associated with a phenotype of hypermutation,  
336 microsatellite stability and favourable prognosis, possibly due to T cell responses to tumour  
337 neoantigens [53]. The most frequent variant, P286R, has been modelled in *S. cerevisiae* (Pol2-P301R),  
338 where it causes a strong mutator effect even in the heterozygous condition, in excess to that seen  
339 with exonuclease defective Pol2. [23]. However, the mechanisms leading to this hypermutation  
340 phenotype are not well understood.

341

342 Our results show that the equivalent mutation of *POLE-P286R*, *pol2-P287R*, is also highly mutagenic in  
343 fission yeast, with a base substitution frequency much higher than that caused by loss of the  
344 exonuclease activity of Pol  $\epsilon$ . In consonance with findings in human cancers, the most abundant  
345 mutation is a C > A transversion in a TCT context, although the mutational pattern in yeast does not  
346 completely mirror the human pattern. The mutational pattern is not just a reflection of the  
347 polymerase defect, since it is also affected by mismatch repair, which may differ in its specificity and  
348 efficiency between yeast and humans. In addition, the *pol2-P287R* mutant shows reduced S phase  
349 kinetics, sensitivity to DNA damaging agents, increased RPA foci, dependence on Rad3, and a low level  
350 of Chk1 and Cds1 phosphorylation, indicating partial activation of the DNA damage and replication  
351 checkpoints. The human *POLE-P286R* mutation is found in the heterozygous condition, so we would  
352 not predict tumour cells carrying this mutation would necessarily show an S phase delay. Indeed mice  
353 heterozygous for the P286R are born healthy and fertile, with no enhancement of DNA damage  
354 markers although they are highly cancer prone [54]. In contrast, mice hemizygous for the *POLE-P286R*  
355 mutation generally show embryonic lethality. Thus mammalian cells heterozygous for the *POLE-P286R*  
356 mutation may be ideally predisposed for cancer formation, having a sufficiently high mutation rate  
357 but without defects in cell cycle progression.

358

359 Budding yeast Pol2-P301R has a lower mutation rate than Pol2-exonull *in vitro* [26], so it is not clear  
360 what is responsible for the high *in vivo* mutation rate. One suggestion is that the strong mutator effect  
361 results from higher polymerase activity and more efficient mismatch extension capacity, which leads  
362 to misincorporation rather than proofreading [26]. Our data suggest that additional mechanisms are  
363 involved, namely that Pol  $\kappa$ , and to a lesser extent Pol  $\eta$ , contributes to the elevated mutation rate of  
364 the *pol2-P287R* mutant, similar to the situation seen with defective Pol  $\alpha$  [31]. Pol  $\kappa$ , and less so Pol  
365  $\eta$ , are efficient at extending from a mismatch [55, 56], and show error rates considerably higher than  
366 Pols  $\delta$  and  $\epsilon$  [56]. Pol  $\kappa$  has also been implicated in restart of stalled replication forks [57]. Previous  
367 work has suggested that following misincorporation, the budding yeast Pol2-P301R has a tendency  
368 to extend the mismatch [26], but the ability of Pol  $\delta$  to proofread Pol2-P301R errors means that the  
369 enzyme must dissociate some of the time [58]. We suggest that in this situation, Pols  $\kappa$  and  $\eta$  may  
370 compete with Pol  $\delta$  for extension of the leading strand, leading to mutagenic synthesis  
371 (Supplementary Fig. S6). Interestingly, our data show that mutation of the proline equivalent to P286  
372 in Pol  $\delta$  does not lead to hypermutation, consistent with the fact that tumour sequencing has not  
373 identified this as a clinical mutation. Displacement of the lagging strand polymerase may simply lead  
374 to downstream initiation of an Okazaki fragment, and thus no polymerase switching.

375

376 In addition to their roles in lesion bypass during translesion synthesis, Pols  $\kappa$  and  $\eta$  have important  
377 functions during the replication of hard-to-replicate sites such as microsatellite sequences, G-  
378 quadruplex and common fragile sites (CFSs), and during conditions of replicative stress [59]. Pol  $\epsilon$   
379 P287R may be more prone to stalling or displacement at such sequences compared to wild-type or  
380 exonull polymerases, as suggested by the interaction with Pfh1 reported here, perhaps again allowing  
381 exchange with Pol  $\kappa$ .

382

383 *POLE* proofreading domain-mutant tumours may be particularly sensitive to specific therapeutic  
384 approaches due to their exceptional mutation burden. One strategy to decrease the overall fitness of  
385 hypermutating tumour cells is by increasing the mutation frequency further to induce an error  
386 catastrophe, similar to lethal mutagenesis of viruses [60]. Indeed, we found that *pol2-P287R* cells are  
387 sensitive to high dNTP levels, which probably reflects a further increase in mutation rate leading to  
388 cell death by error-induced catastrophe. Normal somatic cells might be much less sensitive to a  
389 transient increase in mutation rate [60, 61]. Clinically, an increase in the mutation rate could be  
390 effected by, for instance, decreasing the efficiency of MMR, or inducing DNA lesions using DNA  
391 damaging agents or nucleoside analogues. Additionally, upregulating RNR or inactivating SAMHD1

392 would also increase dNTP levels. Interestingly, SAMHD1 putative cancer drivers [62] are not found in  
393 any of the POLE-P286R tumours from a collection containing 2188 non-redundant samples from 10  
394 colorectal and endometrial studies [63, 64], suggesting that these mutations might be mutually  
395 exclusive.

396

397 In conclusion, while previous work has focused on features of POLE P286R function that are intrinsic  
398 to the enzyme, our results in *S. pombe* suggest that some aspects the high mutagenesis is a result of  
399 in vivo responses to polymerase malfunction. Clearly it will be of interest to see a similar situation is  
400 also found in human cells.

401

## 402 **Materials and methods**

403

### 404 ***S. pombe* methods**

405 Standard media and genetic techniques were used as previously described [65]. Cultures were  
406 grown in either rich medium (YE3S), or Edinburgh minimal medium (EMM) supplemented with the  
407 appropriate requirements and incubated at 30°C with shaking, unless otherwise stated. Nitrogen  
408 starvation was carried out using EMM lacking NH<sub>4</sub>Cl. The relevant genotypes and source of the  
409 strains used in this study are listed in Table S1. Oligos used for strain constructions are listed in Table  
410 S2.

411

412 For spot testing, cells were grown overnight to exponential phase and five serial dilutions (1/4) of  
413 cells were spotted on agar plates using a replica plater (Sigma R2383). Plates were incubated at the  
414 relevant temperature, and photographed after 2-3 days.

415

416 Growth curves were obtained using the Bioscreen C MBR machine. Cultures in exponential phase  
417 were adjusted to 2 x 10<sup>6</sup> cells/ml and 250 µl were dispensed in 4-8 replicate wells for each strain. The  
418 plate was incubated at 30°C with constant shaking at maximum amplitude. The OD600 of each well  
419 was measured every 20 minutes for 22 hours. Duplication time was determined via analysis of the  
420 exponential phase of the plotted log<sub>2</sub> graph time vs OD600 using the exponential growth equation  
421 available on Prism.

422

423 Cell lengths were determined using an AxioPlan 2 microscope and pictures were taken using a  
424 Hamamatsu ORCA E camera system with Micro-Manager 1.3 software. Cell length was measured

425 using ImageJ. Fluorescence microscopy was carried out as previously described [66], except cells  
426 were not fixed.

427

428 dNTP levels were determined as previously described [67].

429

430 *S. pombe pol2* variant strains were constructed as described previously [68]. The *pol2-P287R* strain  
431 was constructed using mutagenic primers 1128 and 1129; the P>R mutation generates an NruI site.

432

433 *S. pombe pol3* variant strains were constructed as previously described [69]. For strain  
434 *pol3P311R::kanMX6* (3419), mutagenic primers used were 1192 and 1193, with flanking primers  
435 1148 and 1076. The mutation introduces a NruI site. The final PCR product was cloned into pFA6a as  
436 AscI-BamHI fragment and integrated at the *pol3* locus after cleavage with XhoI. The exonull strain  
437 *pol3D386A* was based on the mouse D400A mutation which has been shown to lack exonuclease  
438 activity. [70]. Mutagenic primers used were 1140 and 1141, with flanking primers 1075 and 1076;  
439 the mutation also introduces a NruI site. The final PCR product was cloned as above and integrated  
440 into the *pol3* locus after cleavage with CspCI.

#### 441 **Protein analysis**

442 Proteins were extracted by TCA method and resolved on 3-8% Tris Acetate NuPAGE (Thermo  
443 Scientific) in reducing conditions (NuPAGE Tris Acetate SDS running buffer – Thermo Scientific) [71].  
444 For analysis of Chk1 and Cds1 phosphorylation, cells were grown to log phase in YES at 30°C. As a  
445 positive control for Chk1 phosphorylation, cells were grown YES plus 0.025% MMS. As a positive  
446 control for Cds1 phosphorylation, cells were grown YES plus 10 mM hydroxyurea. In the case of P-  
447 Chk1 analysis, proteins were resolved by SDS-PAGE using 10% gels with an acrylamide/bisacrylamide  
448 ratio of 99:1 [72]. Phos-tag acrylamide gels (Wako) were used to detect Cds1-P. Proteins were  
449 transferred onto a PVDF membrane by a dry transfer method using the iBlot2 Dry Blotting System  
450 (Thermo Fisher Scientific). Every step from blocking to washes to antibody incubation was  
451 performed via sequential lateral flow with the iBind Flex Western device. HA-tagged proteins were  
452 detected with the rabbit monoclonal antibody HA-Tag (C29F4). The secondary anti-rabbit used was  
453 Dako PO448.  $\alpha$  tubulin was used as a loading control and the probing was done by using mouse  
454 monoclonal anti- $\alpha$ -tubulin (Sigma T5168). The secondary antibody used was goat anti-mouse (HRP)  
455 Ab97040.

456



#### 457 **Mutation accumulation experiments**

458 Strains were woken up from -70°C, then single colonies were used to start lineages. One colony was  
459 grown up to prepare DNA for sequencing (generation 0) and restreaked on a fresh YES plate. After  
460 the colonies had grown up (3 days), a single colony was restreaked on a second YES plate. This  
461 process was repeated until the cells had gone through approximately 200 generations (11 passages).  
462 At the end of the experiment a single colony was grown up to prepare DNA for sequencing  
463 (generation 200). Variants were called (see sequencing analysis) and mutations were identified if  
464 present in generation 200 DNA but not in generation 0 DNA. Doubling time used to estimate the  
465 number of generations, as previously described [39].

#### 466 **Mutation rate analysis by fluctuation analysis**

467 Mutation to canavanine resistance was used to estimate mutation rates, as previously described  
468 (Kaur et al., 1999). A culture ( $10^4$  cells/ml) was aliquoted into 12 wells of a 96-well microtitre plate  
469 (0.25 ml/well) and allowed to grow to saturation. Dilutions were plated onto YES plates to determine  
470 the cell concentration, and 0.15 ml of each culture was plated out onto a PMG plate (EMM-G,  
471 (Fantes and Creanor, 1984)) containing 80 µg/ml canavanine. Canavanine-resistant colonies were  
472 counted after 11 days at 30°C. Mutation rates were calculated using the Ma-Sandri-Sarkar maximum  
473 likelihood estimator (Sarkar et al., 1992), implemented in rSalvador (Zheng, 2017).

#### 474 **Sequencing analysis**

475 Libraries were sequenced on a HiSeq2500 (Illumina) to generate 2x150 bases paired reads with an  
476 average genome coverage of ~200-fold and processed with RTA v1.18.66.3. FastQ files for each  
477 sample were obtained using bcl2fastq v2.20.0.422 software (Illumina). More than 6.5 M of pairs per  
478 sample were obtained. QC check of sequencing reads were revised with FastQC software and, then  
479 reads were trimmed off Illumina adapters using Cutadapt 1.16. Trimmed fastq file were aligned to *S.*  
480 *pombe* reference genome (ASM294v2.20 assembly) using Bowtie 2 with '--fr -X 1000 -I 0 -N 0 --local -  
481 k 1' parameters. Sequencing duplicate read alignments were excluded using MarkDuplicates and  
482 sorted using Samtools. For bigwig (bw) representation and visual inspection bamCoverage and IGV  
483 software were used.

484 For the variant calling process, the bam files were processed with mpileup from Samtools and the  
485 calling process were executed with VarScan2. For somatic variant calling VarScan2 was used with  
486 both Generation 0 (G0) and Generation 200 (G200) mpileup file and only the High Confident (HC)



487 variants were retained for next analysis. Human variant calling files from colorectal and endometrial  
488 POLE-P286R cancers were obtained from the cBioPortal curated set of non-redundant studies [63,  
489 64]. To calculate the consensus variants (both in *S. pombe* and human variants) of a genotype we  
490 retained SNPs from different genome positions and, for the same position, only when the same  
491 change occurs in all variant files. All secondary analyses were made with custom python scripts  
492 available under request.

493 Sequencing data from this study have been deposited in the Gene Expression Omnibus (GEO)  
494 database under the accession number GSE169231  
495 (<https://www.ncbi.nlm.nih.gov/geo/query/acc.cgi?acc=GSE169231>).

#### 496 **Bioinformatic analysis**

497 Genomic region annotation data (Fig. 1D) were derived from the *S. pombe* reference genome  
498 (ASM294v2.20 assembly). The 'expected' values correspond to the percentage of each genomic  
499 region across the genome. To determine the 'observed' distribution, the number of substitutions at  
500 each genomic region were calculated using a custom Python script and percentages represented.

501 To establish the base substitution patterns of POLE-P286R colorectal and endometrial cancer, tsv  
502 files corresponding to CRC and UEC samples harbouring *POLE-P286R* mutation were downloaded  
503 from cBioportal [63, 64] and the average percentage of single mutations across all individual samples  
504 per cancer type in their 5' and 3' base sequence context calculated and plotted using a custom  
505 Python script (Figure 2A). For the mutational patterns in fission yeast, 1073 and 746 single base  
506 substitutions from the P287R (this study) and WT [38, 39] MA experiments respectively were  
507 identified and plotted as above (Figure 2B).

508 For determining base composition in the vicinity of mutations (Fig. 2C) 103 bp long DNA sequences  
509 harbouring single base substitutions were aligned to the mismatched position. The percentage of  
510 mononucleotides were calculated for each position. Alignment of the same number of sequences  
511 103-bp long randomly selected along the *S. pombe* genome were used as a control.

512 A + T content of regions harbouring TCT > TAT transversion ranging from 9-20 bp, 21-50 bp and >50  
513 bp (Figure 2D) was calculated using *S. pombe* or human GRCh37 reference genomes for *pol2-P287R*  
514 and P286R-CRC/P286R-UEC samples respectively.

515 Base substitution patterns of the wild-type and *pol2-P287R* strains (Figure 2B) were normalized by  
516 the trinucleotide frequencies in the fission yeast genome to generate the corresponding mutational

517 patterns. The latter were then corrected for the difference in trinucleotide frequencies in the *S.*  
518 *pombe* genome and the human exome to establish the humanized versions (Figure 3A), as previously  
519 described [41].

520 Cosine similarity values for the comparison between humanized *S. pombe* mutation patterns with  
521 COSMIC v3.1 signatures (both adjusted to human whole-exome trinucleotide frequencies) were  
522 calculated using the Python cosine\_similarity script from Scikit-learn [73]. The heat map (Fig. 3B) was  
523 generated using Morpheus software (Morpheus, <https://software.broadinstitute.org/morpheus>)

524

#### 525 **Flow cytometry**

526 Cells were fixed in 70% ethanol and analysed after RNase digestion and SYTOX Green staining as  
527 previously described [74].

528

#### 529 **DNA combing**

530 DNA combing was carried out basically as previously described [75, 76], using a Genomic Vision  
531 Molecular Combing system and CombiCoverslips.. A pulse of 100  $\mu$ M EdU for 15 minutes was used  
532 to label DNA and incorporated EdU was detected using AlexaFluor 488 Azide A10266 (ThermoFisher  
533 Scientific) A10266.

534

535

536

537

538

539

## 540 **Acknowledgements**

541 This work was supported by the Medical Research Council (grant MR/L016591/1 to SC and  
542 SEK) and the European Research Council (EVOCAN grant 340560 to Ian Tomlinson). We are  
543 grateful to Catherine Green and Jane Mellor for providing lab facilities following the abrupt  
544 closure of the Tinbergen building in February 2017. We thank Tony Carr, Stéphane Coulon,  
545 Christian Holmberg, Edgar Hartsuiker, Paul Russell, Virginia Zakian and NBRP Japan for  
546 strains or plasmids. We are grateful to Philippe Pasero providing facilities and guidance  
547 regarding DNA combing.

## 548 **References**

- 549 1. Garg P, Burgers PMJ. DNA Polymerases that Propagate the Eukaryotic DNA  
550 Replication Fork. *Critical Reviews in Biochemistry and Molecular Biology*. 2005;40(2):115-28.  
551 doi: 10.1080/10409230590935433.
- 552 2. Johnson A, O'Donnell M. CELLULAR DNA REPLICASES: Components and Dynamics at  
553 the Replication Fork. *Annual Review of Biochemistry*. 2005;74(1):283-315. doi:  
554 10.1146/annurev.biochem.73.011303.073859.
- 555 3. Pursell ZF, Kunkel TA. DNA polymerase epsilon: a polymerase of unusual size (and  
556 complexity). *Prog Nucleic Acid Res Mol Biol*. 2008;82:101-45. Epub 2008/10/22. doi:  
557 10.1016/S0079-6603(08)00004-4. PubMed PMID: 18929140; PubMed Central PMCID:  
558 PMC3694787.
- 559 4. Bermudez VP, Farina A, Raghavan V, Tappin I, Hurwitz J. Studies on human DNA  
560 polymerase epsilon and GINS complex and their role in DNA replication. *The Journal of*  
561 *biological chemistry*. 2011;286(33):28963-77. doi: 10.1074/jbc.M111.256289.
- 562 5. Dua R, Levy DL, Li CM, Snow PM, Campbell JL. In vivo reconstitution of  
563 *Saccharomyces cerevisiae* DNA polymerase epsilon in insect cells. Purification and  
564 characterization. *The Journal of biological chemistry*. 2002;277(10):7889-96. doi:  
565 10.1074/jbc.M108546200.
- 566 6. Hogg M, Osterman P, Bylund GO, Ganai RA, Lundström E-B, Elisabeth Sauer-Eriksson  
567 A, et al. Structural basis for processive DNA synthesis by yeast DNA polymerase  $\epsilon$ . *Nature*  
568 *Publishing Group*. 2013;21(1). doi: 10.1038/nsmb.2712.
- 569 7. Shcherbakova PV, Pavlov YI, Chilkova O, Rogozin IB, Johansson E, Kunkel TA. Unique  
570 error signature of the four-subunit yeast DNA polymerase epsilon. *J Biol Chem*.  
571 2003;278(44):43770-80. Epub 2003/07/29. doi: 10.1074/jbc.M306893200. PubMed PMID:  
572 12882968.
- 573 8. Thomas DC, Roberts JD, Sabatino RD, Myers TW, Tan CK, Downey KM, et al. Fidelity  
574 of mammalian DNA replication and replicative DNA polymerases. *Biochemistry*.  
575 1991;30(51):11751-9.

- 576 9. Jain R, Rajashankar KR, Buku A, Johnson RE, Prakash L, Prakash S, et al. Crystal  
577 Structure of Yeast DNA Polymerase  $\epsilon$  Catalytic Domain. PLoS ONE. 2014;9(4):e94835-e. doi:  
578 10.1371/journal.pone.0094835.
- 579 10. Morrison A, Bell JB, Kunkel TA, Sugino A. Eukaryotic DNA polymerase amino acid  
580 sequence required for 3'----5' exonuclease activity. Proc Natl Acad Sci U S A.  
581 1991;88(21):9473-7. Epub 1991/11/01. doi: 10.1073/pnas.88.21.9473. PubMed PMID:  
582 1658784; PubMed Central PMCID: PMC52740.
- 583 11. Albertson TM, Ogawa M, Bugni JM, Hays LE, Chen Y, Wang Y, et al. DNA polymerase  
584 epsilon and delta proofreading suppress discrete mutator and cancer phenotypes in mice.  
585 Proceedings of the National Academy of Sciences of the United States of America.  
586 2009;106(40):17101-4. doi: 10.1073/pnas.0907147106.
- 587 12. Getz G, Gabriel SB, Cibulskis K, Lander E, Sivachenko A, Sougnez C, et al. Integrated  
588 genomic characterization of endometrial carcinoma. Nature. 2013;497(7447):67-73. doi:  
589 10.1038/nature12113.
- 590 13. Network TCGA. Comprehensive molecular characterization of human colon and  
591 rectal cancer. Nature. 2012;487(7407):330-7. doi: 10.1038/nature11252.
- 592 14. Seshagiri S, Stawiski EW, Durinck S, Modrusan Z, Storm EE, Conboy CB, et al.  
593 Recurrent R-spondin fusions in colon cancer. Nature. 2012;488(7413):660-4. doi:  
594 10.1038/nature11282.
- 595 15. Mur P, Garcia-Mulero S, Del Valle J, Magraner-Pardo L, Vidal A, Pineda M, et al. Role  
596 of POLE and POLD1 in familial cancer. Genet Med. 2020;22(12):2089-100. Epub 2020/08/15.  
597 doi: 10.1038/s41436-020-0922-2. PubMed PMID: 32792570; PubMed Central PMCID:  
598 PMC7708298.
- 599 16. Church DN, Briggs SEW, Palles C, Domingo E, Kearsley SJ, Grimes JM, et al. DNA  
600 polymerase  $\epsilon$  and  $\delta$  exonuclease domain mutations in endometrial cancer. Human  
601 Molecular Genetics. 2013;22(14):2820-8. doi: 10.1093/hmg/ddt131.
- 602 17. Hu H, Cai W, Wu D, Hu W, Dong Wang L, Mao J, et al. Ultra-mutated colorectal  
603 cancer patients with POLE driver mutations exhibit distinct clinical patterns. Cancer Med.  
604 2021;10(1):135-42. Epub 2020/10/31. doi: 10.1002/cam4.3579. PubMed PMID: 33125191.
- 605 18. Rayner E, van Gool IC, Palles C, Kearsley SE, Bosse T, Tomlinson I, et al. A panoply of  
606 errors: polymerase proofreading domain mutations in cancer. Nat Rev Cancer.  
607 2016;16(2):71-81. Epub 2016/01/30. doi: 10.1038/nrc.2015.12. PubMed PMID: 26822575.
- 608 19. Barbari SR, Shcherbakova PV. Replicative DNA polymerase defects in human  
609 cancers\_ Consequences, mechanisms, and implications for therapy. DNA Repair. 2017:1-10.  
610 doi: 10.1016/j.dnarep.2017.06.003.
- 611 20. Alexandrov LB, Nik-Zainal S, Wedge DC, Aparicio SAJR, Behjati S, Biankin AV, et al.  
612 Signatures of mutational processes in human cancer. Nature. 2013;500(7463):415-21. doi:  
613 10.1038/nature12477.
- 614 21. Shinbrot E, Henninger EE, Weinhold N, Covington KR, Goksenin AY, Schultz N, et al.  
615 Exonuclease mutations in DNA polymerase epsilon reveal replication strand specific  
616 mutation patterns and human origins of replication. Genome Res. 2014;24(11):1740-50.  
617 Epub 2014/09/18. doi: 10.1101/gr.174789.114. PubMed PMID: 25228659; PubMed Central  
618 PMCID: PMC4216916.
- 619 22. Alexandrov LB, Kim J, Haradhvala NJ, Huang MN, Tian Ng AW, Wu Y, et al. The  
620 repertoire of mutational signatures in human cancer. Nature. 2020;578(7793):94-101. Epub  
621 2020/02/07. doi: 10.1038/s41586-020-1943-3. PubMed PMID: 32025018; PubMed Central  
622 PMCID: PMC7054213.

- 623 23. Kane DP, Shcherbakova PV. A common cancer-associated DNA polymerase epsilon  
624 mutation causes an exceptionally strong mutator phenotype, indicating fidelity defects  
625 distinct from loss of proofreading. *Cancer Res.* 2014;74(7):1895-901. Epub 2014/02/15. doi:  
626 10.1158/0008-5472.CAN-13-2892. PubMed PMID: 24525744; PubMed Central PMCID:  
627 PMCPMC4310866.
- 628 24. Ahn S-M, Adnan Ahmad A, Kim J, Kim D, Chun S-M, Kim J, et al. The somatic POLE  
629 P286R mutation defines a unique subclass of colorectal cancer featuring hypermutation,  
630 representing a potential genomic biomarker for immunotherapy. *Oncotarget.*  
631 2016;7(42):68638-49. doi: 10.18632/oncotarget.11862.
- 632 25. Li HD, Cuevas I, Zhang M, Lu C, Alam MM, Fu YX, et al. Polymerase-mediated  
633 ultramutagenesis in mice produces diverse cancers with high mutational load. *J Clin Invest.*  
634 2018;128(9):4179-91. Epub 2018/08/21. doi: 10.1172/JCI122095. PubMed PMID: 30124468;  
635 PubMed Central PMCID: PMCPMC6118636.
- 636 26. Xing X, Kane DP, Bullock CR, Moore EA, Sharma S, Chabes A, et al. A recurrent cancer-  
637 associated substitution in DNA polymerase  $\epsilon$  produces a hyperactive enzyme. *Nature*  
638 *Communications.* 2019;10(1):374-. doi: 10.1038/s41467-018-08145-2.
- 639 27. Parkash V, Kulkarni Y, Ter Beek J, Shcherbakova PV, Kamerlin SCL, Johansson E.  
640 Structural consequence of the most frequently recurring cancer-associated substitution in  
641 DNA polymerase epsilon. *Nat Commun.* 2019;10(1):373. Epub 2019/01/24. doi:  
642 10.1038/s41467-018-08114-9. PubMed PMID: 30670696; PubMed Central PMCID:  
643 PMCPMC6342957.
- 644 28. Datta A, Schmeits JL, Amin NS, Lau PJ, Myung K, Kolodner RD. Checkpoint-Dependent  
645 Activation of Mutagenic Repair in *Saccharomyces cerevisiae* pol3-01 Mutants. *Molecular*  
646 *Cell.* 2000;6(3):593-603. doi: 10.1016/S1097-2765(00)00058-7.
- 647 29. Mertz TM, Sharma S, Chabes A, Shcherbakova PV. Colon cancer-associated mutator  
648 DNA polymerase  $\delta$  variant causes expansion of dNTP pools increasing its own infidelity.  
649 *Proceedings of the National Academy of Sciences of the United States of America.*  
650 2015;112(19):E2467-76. doi: 10.1073/pnas.1422934112.
- 651 30. Williams LN, Marjavaara L, Knowels GM, Schultz EM, Fox EJ, Chabes A, et al. dNTP  
652 pool levels modulate mutator phenotypes of error-prone DNA polymerase  $\epsilon$  variants.  
653 *Proceedings of the National Academy of Sciences of the United States of America.*  
654 2015;112(19):E2457-66. doi: 10.1073/pnas.1422948112.
- 655 31. Kai M, Wang TSF. Checkpoint activation regulates mutagenic translesion synthesis.  
656 *Genes & development.* 2003;17(1):64-76. doi: 10.1101/gad.1043203.
- 657 32. Pursell ZF, Isoz I, Lundstrom EB, Johansson E, Kunkel TA. Regulation of B family DNA  
658 polymerase fidelity by a conserved active site residue: characterization of M644W, M644L  
659 and M644F mutants of yeast DNA polymerase. *Nucleic Acids Research.* 2007;35(9):3076-86.  
660 doi: 10.1093/nar/gkm132.
- 661 33. Korona DA, LeCompte KG, Pursell ZF. The high fidelity and unique error signature of  
662 human DNA polymerase. *Nucleic Acids Research.* 2011;39(5):1763-73. doi:  
663 10.1093/nar/gkq1034.
- 664 34. León-Castillo A, Britton H, McConechy MK, McAlpine JN, Nout R, Kommos S, et al.  
665 Interpretation of somatic *POLE* mutations in endometrial carcinoma. *The Journal of*  
666 *Pathology.* 2020;250(3):323-35. doi: 10.1002/path.5372.
- 667 35. Fang H, Barbour JA, Poulos RC, Katainen R, Aaltonen LA, Wong JWH. Mutational  
668 processes of distinct POLE exonuclease domain mutants drive an enrichment of a specific  
669 TP53 mutation in colorectal cancer. *PLoS Genet.* 2020;16(2):e1008572. Epub 2020/02/06.

- 670 doi: 10.1371/journal.pgen.1008572. PubMed PMID: 32012149; PubMed Central PMCID:  
671 PMCPMC7018097.
- 672 36. Poulos RC, Olivier J, Wong JWH. The interaction between cytosine methylation and  
673 processes of DNA replication and repair shape the mutational landscape of cancer genomes.  
674 *Nucleic Acids Research*. 2017;45(13):7786-95. doi: 10.1093/nar/gkx463.
- 675 37. Tomkova M, McClellan M, Kriaucionis S, Schuster-Böckler B. DNA Replication and  
676 associated repair pathways are involved in the mutagenesis of methylated cytosine. *DNA*  
677 *Repair*. 2018;62:1-7. doi: 10.1016/j.dnarep.2017.11.005.
- 678 38. Behringer MG, Hall DW. Genome-Wide Estimates of Mutation Rates and Spectrum in  
679 *Schizosaccharomyces pombe* Indicate CpG Sites are Highly Mutagenic Despite the Absence  
680 of DNA Methylation. *G3 (Bethesda, Md)*. 2015;6(1):149-60. doi: 10.1534/g3.115.022129.
- 681 39. Farlow A, Long H, Arnoux S, Sung W, Doak TG, Nordborg M, et al. The Spontaneous  
682 Mutation Rate in the Fission Yeast *Schizosaccharomyces pombe*. *Genetics*. 2015;201(2):737-  
683 44. doi: 10.1534/genetics.115.177329.
- 684 40. Wood V, Gwilliam R, Rajandream MA, Lyne M, Lyne R, Stewart A, et al. The genome  
685 sequence of *Schizosaccharomyces pombe*. *Nature*. 2002;415(6874):871-80. Epub  
686 2002/02/23. doi: 10.1038/nature724. PubMed PMID: 11859360.
- 687 41. Meier B, Volkova NV, Hong Y, Schofield P, Campbell PJ, Gerstung M, et al. Mutational  
688 signatures of DNA mismatch repair deficiency in *C. elegans* and human cancers. *Genome*  
689 *Research*. 2018;28(5):666-75. doi: 10.1101/gr.226845.117.
- 690 42. Blokzijl F, Janssen R, van Boxtel R, Cuppen E. MutationalPatterns: comprehensive  
691 genome-wide analysis of mutational processes. *Genome Med*. 2018;10(1):33. Epub  
692 2018/04/27. doi: 10.1186/s13073-018-0539-0. PubMed PMID: 29695279; PubMed Central  
693 PMCID: PMC5922316.
- 694 43. Fleck O, Vejrup-Hansen R, Watson A, Carr AM, Nielsen O, Holmberg C. Spd1  
695 accumulation causes genome instability independently of ribonucleotide reductase activity  
696 but functions to protect the genome when deoxynucleotide pools are elevated. *Journal of*  
697 *cell science*. 2013;126(Pt 21):4985-94. doi: 10.1242/jcs.132837.
- 698 44. Gou L, Bloom JS, Kruglyak L. The genetic basis of mutation rate variation in yeast.  
699 *Genetics*. 2019;211(2):731-40. doi: 10.1534/genetics.118.301609.
- 700 45. Iyer DR, Rhind N. Replication fork slowing and stalling are distinct, checkpoint-  
701 independent consequences of replicating damaged DNA. *PLOS Genetics*.  
702 2017;13(8):e1006958-e. doi: 10.1371/journal.pgen.1006958.
- 703 46. Schmidt TT, Reyes G, Gries K, Ceylan CÜ, Sharma S, Meurer M, et al. Alterations in  
704 cellular metabolism triggered by URA7 or GLN3 inactivation cause imbalanced dNTP pools  
705 and increased mutagenesis. *Proceedings of the National Academy of Sciences of the United*  
706 *States of America*. 2017;114(22):E4442-E51. doi: 10.1073/pnas.1618714114.
- 707 47. Pai CC, Kearsley S. A Critical Balance: dNTPs and the Maintenance of Genome  
708 Stability. *Genes*. 2017;8(2):57-. doi: 10.3390/genes8020057.
- 709 48. Azvolinsky A, Dunaway S, Torres JZ, Bessler JB, Zakian VA. The *S. cerevisiae* Rrm3p  
710 DNA helicase moves with the replication fork and affects replication of all yeast  
711 chromosomes. *Genes & development*. 2006;20(22):3104-16. doi: 10.1101/gad.1478906.
- 712 49. Gagou ME, Ganesh A, Phear G, Robinson D, Petermann E, Cox A, et al. Human PIF1  
713 helicase supports DNA replication and cell growth under oncogenic-stress. *Oncotarget*.  
714 2014;5(22):11381-98. doi: 10.18632/oncotarget.2501.
- 715 50. McDonald KR, Guise AJ, Pourbozorgi-Langroudi P, Cristea IM, Zakian VA, Capra JA, et  
716 al. Pfh1 Is an Accessory Replicative Helicase that Interacts with the Replisome to Facilitate



- 717 Fork Progression and Preserve Genome Integrity. *PLOS Genetics*. 2016;12(9):e1006238-e.  
718 doi: 10.1371/journal.pgen.1006238.
- 719 51. Pinter SF, Aubert SD, Zakian VA. The Schizosaccharomyces pombe Pfh1p DNA  
720 Helicase Is Essential for the Maintenance of Nuclear and Mitochondrial DNA. *Molecular and*  
721 *Cellular Biology*. 2008;28(21):6594-608. doi: 10.1128/MCB.00191-08.
- 722 52. Audry J, Maestroni L, Delagoutte E, Gauthier T, Nakamura TM, Gachet Y, et al. RPA  
723 prevents G-rich structure formation at lagging-strand telomeres to allow maintenance of  
724 chromosome ends. *The EMBO journal*. 2015;34(14):1942-58. doi:  
725 10.15252/embj.201490773.
- 726 53. van Gool IC, Bosse T, Church DN. POLE proofreading mutation, immune response  
727 and prognosis in endometrial cancer. *Oncoimmunology*. 2016;5(3):e1072675. Epub  
728 2016/05/04. doi: 10.1080/2162402X.2015.1072675. PubMed PMID: 27141333; PubMed  
729 Central PMCID: PMCPMC4839358.
- 730 54. Li HD, Lu C, Zhang H, Hu Q, Zhang J, Cuevas IC, et al. A PoleP286R mouse model of  
731 endometrial cancer recapitulates high mutational burden and immunotherapy response. *JCI*  
732 *Insight*. 2020;5(14). Epub 2020/07/24. doi: 10.1172/jci.insight.138829. PubMed PMID:  
733 32699191; PubMed Central PMCID: PMCPMC7453891.
- 734 55. Washington MT, Johnson RE, Prakash L, Prakash S. Human DINB1-encoded DNA  
735 polymerase kappa is a promiscuous extender of mispaired primer termini. *Proc Natl Acad Sci*  
736 *U S A*. 2002;99(4):1910-4. Epub 2002/02/14. doi: 10.1073/pnas.032594399. PubMed PMID:  
737 11842189; PubMed Central PMCID: PMCPMC122293.
- 738 56. Johnson RE, Prakash S, Prakash L. The human DINB1 gene encodes the DNA  
739 polymerase Poltheta. *Proc Natl Acad Sci U S A*. 2000;97(8):3838-43. Epub 2000/04/13. doi:  
740 10.1073/pnas.97.8.3838. PubMed PMID: 10760255; PubMed Central PMCID:  
741 PMCPMC18103.
- 742 57. Tonzi P, Yin Y, Lee CWT, Rothenberg E, Huang TT. Translesion polymerase kappa-  
743 dependent DNA synthesis underlies replication fork recovery. *Elife*. 2018;7. Epub  
744 2018/11/14. doi: 10.7554/eLife.41426. PubMed PMID: 30422114; PubMed Central PMCID:  
745 PMCPMC6251625.
- 746 58. Bullock CR, Xing X, Shcherbakova PV. Mismatch repair and DNA polymerase delta  
747 proofreading prevent catastrophic accumulation of leading strand errors in cells expressing  
748 a cancer-associated DNA polymerase variant. *Nucleic Acids Res*. 2020;48(16):9124-34. Epub  
749 2020/08/07. doi: 10.1093/nar/gkaa633. PubMed PMID: 32756902; PubMed Central PMCID:  
750 PMCPMC7498342.
- 751 59. Barnes RP, Hile SE, Lee MY, Eckert KA. DNA polymerases eta and kappa exchange  
752 with the polymerase delta holoenzyme to complete common fragile site synthesis. *DNA*  
753 *Repair*. 2017;57:1-11. doi: 10.1016/j.dnarep.2017.05.006.
- 754 60. Prindle MJ, Fox EJ, Loeb LA. The mutator phenotype in cancer: molecular  
755 mechanisms and targeting strategies. *Current drug targets*. 2010;11(10):1296-303. doi:  
756 10.2174/1389450111007011296.
- 757 61. Fox EJ, Loeb LA. Lethal mutagenesis: targeting the mutator phenotype in cancer.  
758 *Seminars in cancer biology*. 2010;20(5):353-9. doi: 10.1016/j.semcancer.2010.10.005.
- 759 62. Rentoft M, Lindell K, Tran P, Chabes AL, Buckland RJ, Watt DL, et al. Heterozygous  
760 colon cancer-associated mutations of SAMHD1 have functional significance. *Proceedings of*  
761 *the National Academy of Sciences of the United States of America*. 2016;113(17):4723-8.  
762 doi: 10.1073/pnas.1519128113.

- 763 63. Cerami E, Gao J, Dogrusoz U, Gross BE, Sumer SO, Aksoy BA, et al. The cBio cancer  
764 genomics portal: an open platform for exploring multidimensional cancer genomics data.  
765 *Cancer Discov.* 2012;2(5):401-4. Epub 2012/05/17. doi: 10.1158/2159-8290.CD-12-0095.  
766 PubMed PMID: 22588877; PubMed Central PMCID: PMCPMC3956037.
- 767 64. Gao J, Aksoy BA, Dogrusoz U, Dresdner G, Gross B, Sumer SO, et al. Integrative  
768 analysis of complex cancer genomics and clinical profiles using the cBioPortal. *Sci Signal.*  
769 2013;6(269):pl1. Epub 2013/04/04. doi: 10.1126/scisignal.2004088. PubMed PMID:  
770 23550210; PubMed Central PMCID: PMCPMC4160307.
- 771 65. Moreno S, Klar A, Nurse P. Molecular genetic analysis of fission yeast  
772 *Schizosaccharomyces pombe*. *Methods Enzymol.* 1991;194:795-823. Epub 1991/01/01. doi:  
773 10.1016/0076-6879(91)94059-I. PubMed PMID: 2005825.
- 774 66. Guarino E, Shepherd ME, Salguero I, Hua H, Deegan RS, Kearsley SE. Cdt1 proteolysis  
775 is promoted by dual PIP degrons and is modulated by PCNA ubiquitylation. *Nucleic Acids*  
776 *Res.* 2011;39(14):5978-90. Epub 2011/04/16. doi: 10.1093/nar/gkr222. PubMed PMID:  
777 21493688; PubMed Central PMCID: PMCPMC3152358.
- 778 67. Pai CC, Hsu KF, Durley SC, Keszthelyi A, Kearsley SE, Rallis C, et al. An essential role for  
779 dNTP homeostasis following CDK-induced replication stress. *J Cell Sci.* 2019;132(6). Epub  
780 2019/01/25. doi: 10.1242/jcs.226969. PubMed PMID: 30674555; PubMed Central PMCID:  
781 PMCPMC6451416.
- 782 68. Aoude LG, Heitzer E, Johansson P, Gartside M, Wadt K, Pritchard AL, et al. POLE  
783 mutations in families predisposed to cutaneous melanoma. *Fam Cancer.* 2015;14(4):621-8.  
784 Epub 2015/08/08. doi: 10.1007/s10689-015-9826-8. PubMed PMID: 26251183.
- 785 69. Palles C, Cazier JB, Howarth KM, Domingo E, Jones AM, Broderick P, et al. Germline  
786 mutations affecting the proofreading domains of POLE and POLD1 predispose to colorectal  
787 adenomas and carcinomas. *Nat Genet.* 2013;45(2):136-44. Epub 2012/12/25. doi:  
788 10.1038/ng.2503. PubMed PMID: 23263490; PubMed Central PMCID: PMCPMC3785128.
- 789 70. Goldsby RE, Hays LE, Chen X, Olmsted EA, Slayton WB, Spangrude GJ, et al. High  
790 incidence of epithelial cancers in mice deficient for DNA polymerase delta proofreading.  
791 *Proc Natl Acad Sci U S A.* 2002;99(24):15560-5. Epub 2002/11/14. doi:  
792 10.1073/pnas.232340999. PubMed PMID: 12429860; PubMed Central PMCID:  
793 PMCPMC137756.
- 794 71. Ralph E, Boye E, Kearsley SE. DNA damage induces Cdt1 proteolysis in fission yeast  
795 through a pathway dependent on Cdt2 and Ddb1. *EMBO Rep.* 2006;7(11):1134-9. Epub  
796 2006/10/14. doi: 10.1038/sj.embor.7400827. PubMed PMID: 17039252; PubMed Central  
797 PMCID: PMCPMC1679788.
- 798 72. Manjon E, Edreira T, Munoz S, Sanchez Y. Rgf1p (Rho1p GEF) is required for double-  
799 strand break repair in fission yeast. *Nucleic Acids Res.* 2017;45(9):5269-84. Epub  
800 2017/03/24. doi: 10.1093/nar/gkx176. PubMed PMID: 28334931; PubMed Central PMCID:  
801 PMCPMC5435928.
- 802 73. Pedregosa F, Varoquaux G, Gramfort A, Michel V, Thirion B, Grisel O, et al. Scikit-  
803 learn: Machine Learning in {P}ython. *Journal of Machine Learning Research* 2011. p. 2825-30.
- 804 74. Kearsley SE, Brimage L, Namdar M, Ralph E, Yang X. In situ assay for analyzing the  
805 chromatin binding of proteins in fission yeast. *Methods Mol Biol.* 2005;296:181-8. Epub  
806 2004/12/04. doi: 10.1385/1-59259-857-9:181. PubMed PMID: 15576932.
- 807 75. Hua H, Namdar M, Ganier O, Gregan J, Mechali M, Kearsley SE. Sequential steps in  
808 DNA replication are inhibited to ensure reduction of ploidy in meiosis. *Mol Biol Cell.*



809 2013;24(5):578-87. Epub 2013/01/11. doi: 10.1091/mbc.E12-11-0825. PubMed PMID:  
810 23303250; PubMed Central PMCID: PMC3583662.  
811 76. Bianco JN, Poli J, Saksouk J, Bacal J, Silva MJ, Yoshida K, et al. Analysis of DNA  
812 replication profiles in budding yeast and mammalian cells using DNA combing. *Methods*.  
813 2012;57(2):149-57. Epub 2012/05/15. doi: 10.1016/j.ymeth.2012.04.007. PubMed PMID:  
814 22579803.

815

## 816 **Figure legends**

817 Figure 1

818 The *POLE-P286R* hypermutagenic phenotype is conserved in *S. pombe*.

819 A) Multiple sequence alignment showing that the Pro286 residue (red) adjacent to the Exo I  
820 domain (blue shadow) is absolutely conserved in Pol  $\epsilon$  and Pol  $\delta$  orthologues as well as in T4  
821 and RB69 phage polymerases. Catalytic residues of the 3'→5' exonuclease domain are  
822 highlighted in magenta.

823 B) CanR mutation rates of *pol2-P287R*, *pol3-P311R* (equivalent proline to Pol2-P287), and  
824 exonull Pol2 and Pol3 relative to wild type. A multiple comparison using the ordinary one-  
825 way ANOVA revealed that the *pol2-P287R* strain has a significantly greater mutation rate  
826 compared to wild-type (black asterisks, \*\*\* P<0.0001) and *pol2-D276A/E278A* (exonull)  
827 (grey asterisks, \*\* P<0.01).

828 C) Number of base substitutions and frameshift identified in the mutation accumulation  
829 (MA) experiment in wild-type, exonull and *pol2-P287R* cells. To accommodate the possibility  
830 that suppressor mutations would arise in the *pol2-P287R* strain, three lineages were set up  
831 for this strain and the average number of mutations is shown.

832 D) Expected and observed distribution of mutations obtained in *pol2-P287R* cells during the  
833 MA experiment across different genomic regions.

834 Figure 2

835 Mutational spectra of the P286R variant in human adenocarcinomas and *S. pombe*.

836 A) Mutation types in *POLE-P286R* colorectal carcinoma (top) and uterine endometrioid  
837 carcinoma (bottom).

838 B) Mutation types in *pol2-P287R* (top) and wild-type (bottom) [38] *S. pombe*.

839 C) Base composition in the vicinity of mutations in *pol2-P287R* and wild-type genomes.

840 D) Percentage of TCT>TAT in AT-rich sequences in *S. pombe pol2-P287R*, *POLE-P286R*  
841 colorectal carcinoma, and *POLE-P286R* uterine endometrioid carcinoma.

842 Figure 3

843 Comparison between *S. pombe* mutational patterns and human cancer signatures.

844 A) Base substitution patterns of *S. pombe pol2-P287R* and wild-type strains and their  
845 corresponding humanized versions (mirrored).

846 B) Heatmap of cosine similarities between the fission yeast mutational profiles and COSMIC  
847 signature. The signatures have been ordered according to hierarchical clustering using the  
848 cosine similarity between signatures, such that similar signatures are displayed close  
849 together.

850 C) Comparison between COSMIC signature 14 (SBS14) and *pol2-P287R* humanized profile.

851 Figure 4

852 The *pol2-P287R* strain is sensitive to DNA-damaging agents and increased dNTP levels.

853 A) Spot assays to assess sensitivity to DNA-damaging agents of wild-type, exonull and *pol2-*  
854 *P287R* strains. 1:5 serial dilutions of the indicated strains were spotted on YES plates  
855 supplemented with 0.3 and 0.5 µg/ml Bleocin, 0.5 µM 4-NQO, 0.01% MMS, 7.5 mM HU or  
856 no drug and incubated at 26° or 30°C for 2-3 days.

857 B) dNTP levels of the indicated strains measured from samples of exponential growing cells.  
858 Means ± SEs of three experiments are shown. The *cdc22-D57N* mutant, where allosteric  
859 regulation of RNR is inactivated, is shown as a positive control.

860 C) Tetrad dissection of genetic crosses of between *cdc22-D57N* and *pol2* mutants.

861 Representative spores from four asci are shown for each cross.

862 Figure 5

863 *S. pombe pol2-P287R* cells show growth and S phase defects and DNA damage checkpoint  
864 activation.

865 A) Growth rate of wild-type, exonuclease and *pol2-P287R* cells. Growth curves for the  
866 strains indicated were obtained by absorbance measurements every 20 minutes for 22h.  
867 The growth curves are representative of 3 independent experiments. \*\*\*\* P<0.0001.

868 B) S phase progression in wild-type, exonull and *pol2-P287R* cells. Cells were arrested in G1  
869 phase by nitrogen starvation, then refed and progress of S phase was monitored by flow  
870 cytometry.

871 C) DNA combing analysis of replication tracks in wild-type and *pol2-P287R S. pombe* cells.  
872 Strains used were modified to allow uptake of EdU. Cells were pulsed with 100  $\mu$ M EdU for  
873 15 min, then DNA was combed and EdU was detected using fluorescently-tagged AlexaFluor  
874 488 Azide.

875 D) Quantitative analysis of track lengths from experiment described in (C)

876 E) Spot testing of *rad3ts* strains. Serial dilutions of the indicated *S. pombe* strains were  
877 spotted to YES plates and incubated at the indicated temperatures.

878 F) Percentage of RPA foci in unstressed wild-type, exonull and *pol2-P287R* cells. Cells from  
879 the indicated strains were cultured to midlog phase in YES medium and imaged live. The  
880 numbers of foci in at least 350 nuclei were scored in three independent experiments, and  
881 mean values were plotted with error bars representing the standard deviation of the mean.  
882 \*\*\* P<0.0001 (Student's t-test)

883 G) Analysis of Chk1 phosphorylation in wild-type, exonull and *pol2-P287R* cells. Chk1-HA  
884 strains were grown to log phase and protein extracts were analysed by western blotting.  
885 Wild-type cells grown in 0.025% MMS is shown as a positive control.

886 H) Analysis of Cds1-HA phosphorylation in unstressed wild-type and *pol2-P287R* cells. Wild-  
887 type cells grown in YES + 10 mM HU is shown as a positive control. Protein extracts were  
888 analysed by western blotting.  $\alpha$ - tubulin was used as a loading control.

889 Figure 6

890 Genetic interaction between *pol2-P287R* and *pfh1*.

891 A) *nmt1-pfh1* cells were cultured to midlog phase in minimum medium containing 15  $\mu$ M  
892 thiamine, or no thiamine and imaged live. Representative pictures under unrepressed (-Thi)  
893 or *pfh1* repression (+Thi) are shown.

894 B) 1:5 serial dilutions of the indicated strains were spotted onto minimum medium plus or  
895 minus thiamine and incubated 3 days at 26°, 30° and 36°C.

896 C) As (B) except cells were spotted onto plates containing 0.5  $\mu$ M 4-NQO, 0.01% MMS or no  
897 drug.

898 Figure 7

899 Deletion of the TLS Pol  $\kappa$  and  $\eta$  genes reduces the mutation rate of *pol2-P287R* cells.

900 A) Can<sup>R</sup> mutation rates of the indicated strains relative to wild type, determined by  
901 fluctuation analysis.

902 B) Number of base substitutions and frameshift mutations during 200 MA experiments in  
903 single and double polymerase mutants. The horizontal grey line shows the average number  
904 of SNPs in the *pol2-P287R* strain from Fig. 1C. Single 200 generation lineages were analysed  
905 and the total numbers of SNPs/indels found in the 200 generation data relative to the  
906 reference sequence but not in the 0 generation data are shown.

907

908

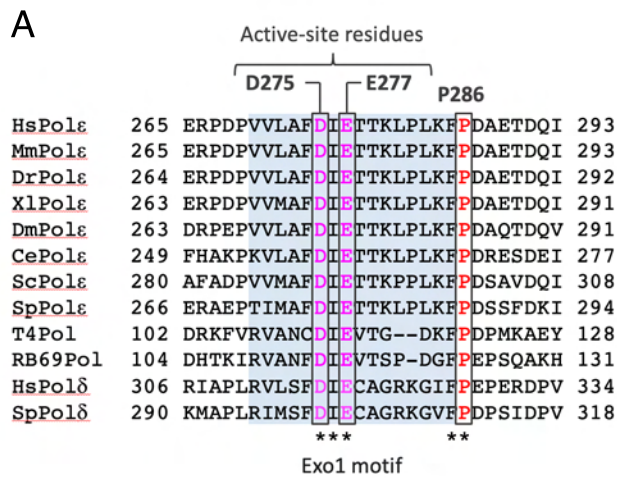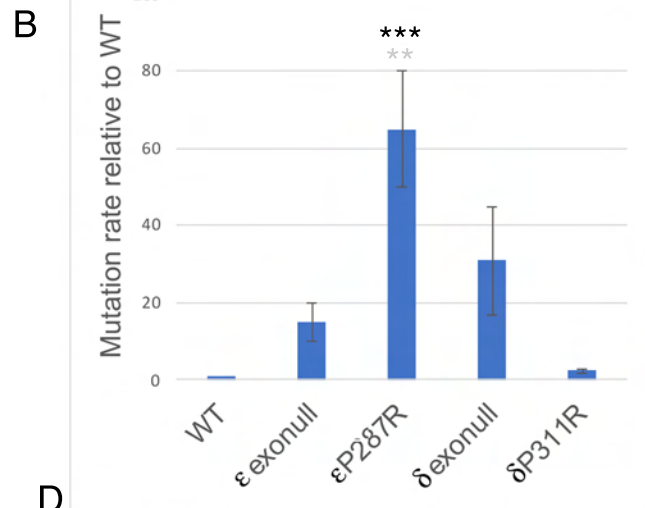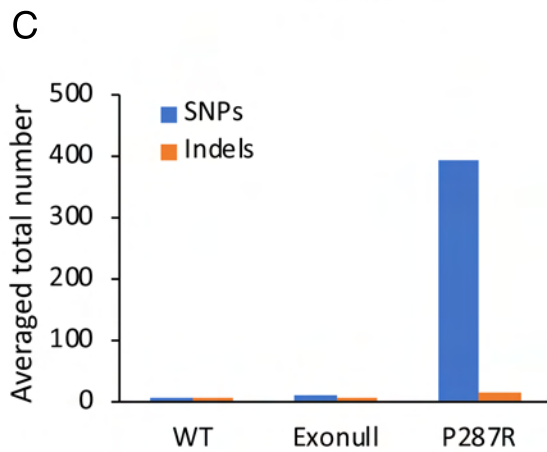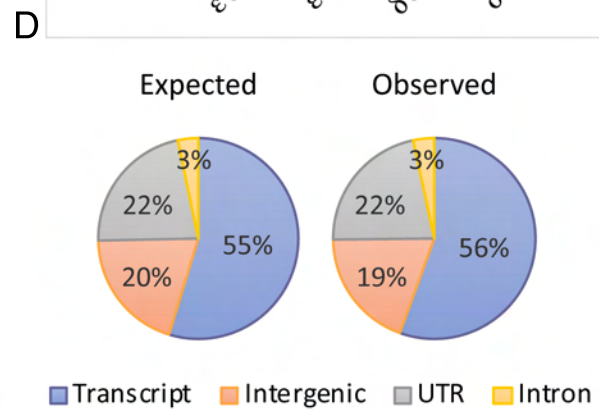

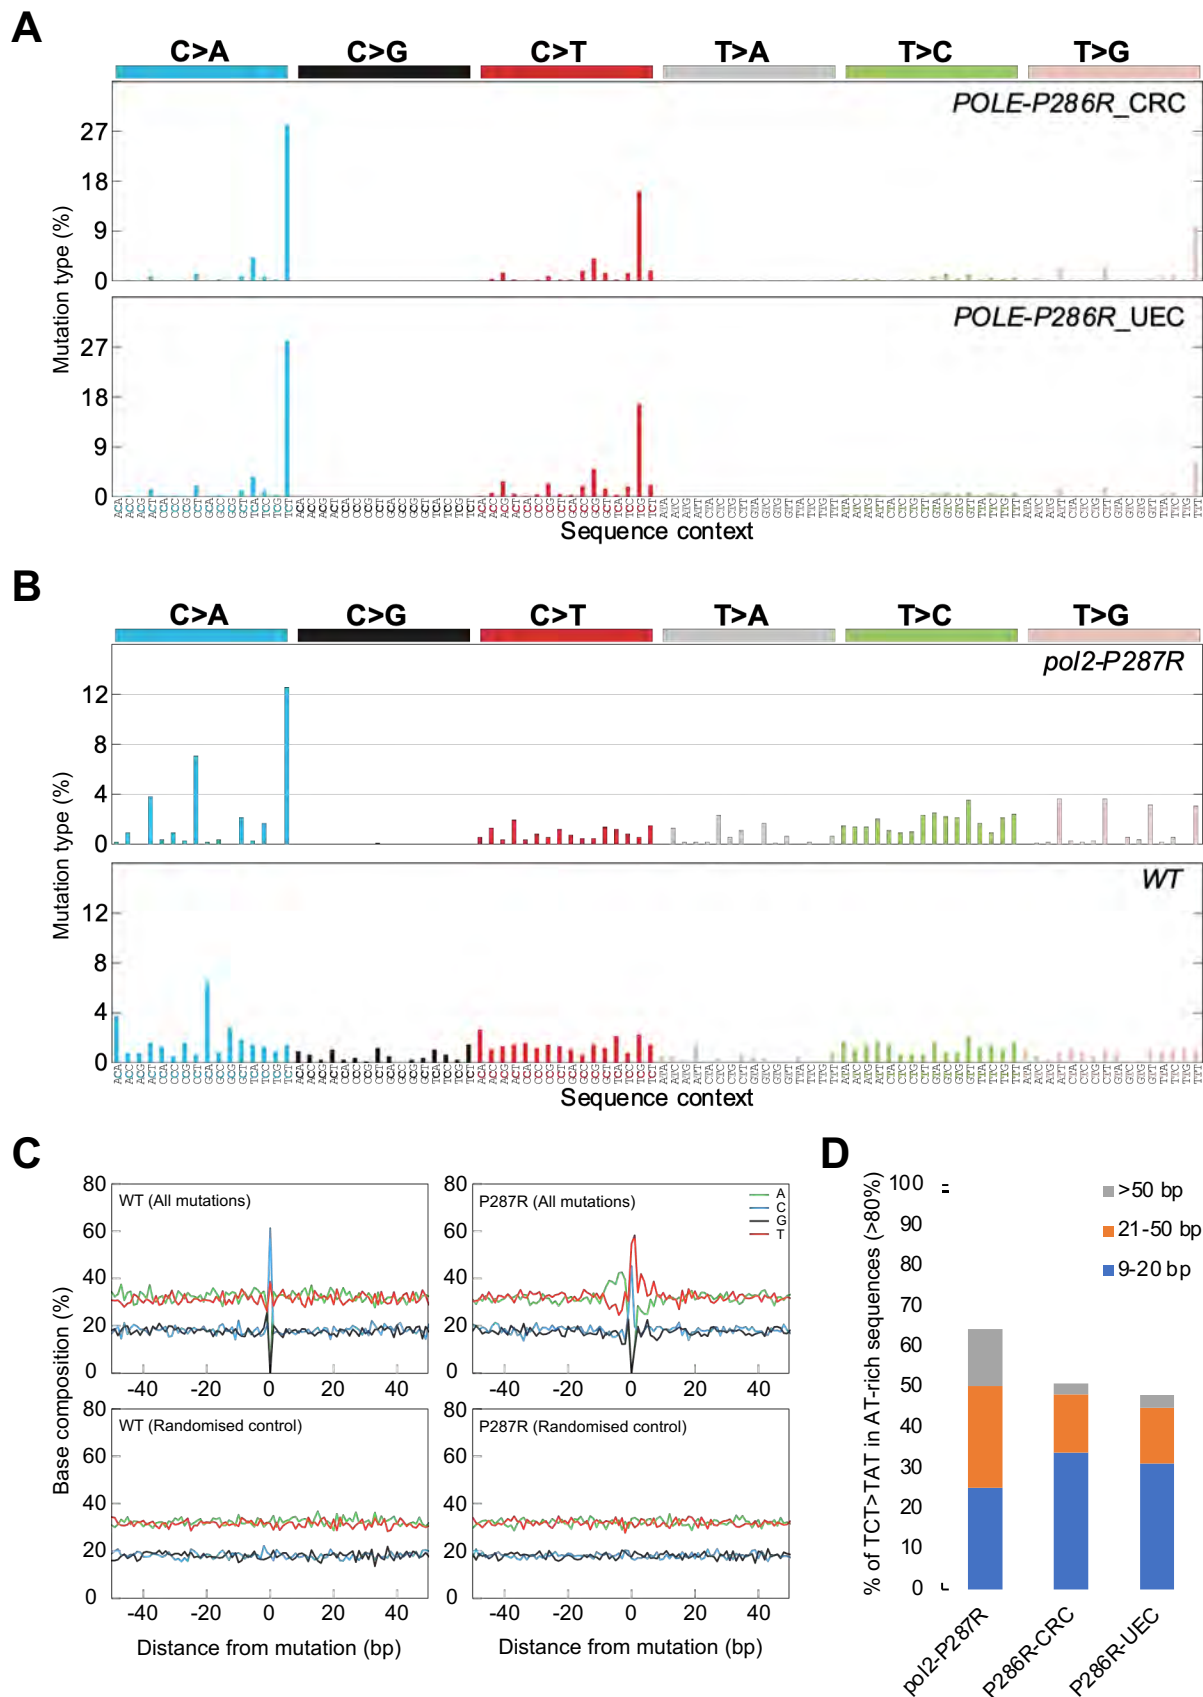

Fig. 2

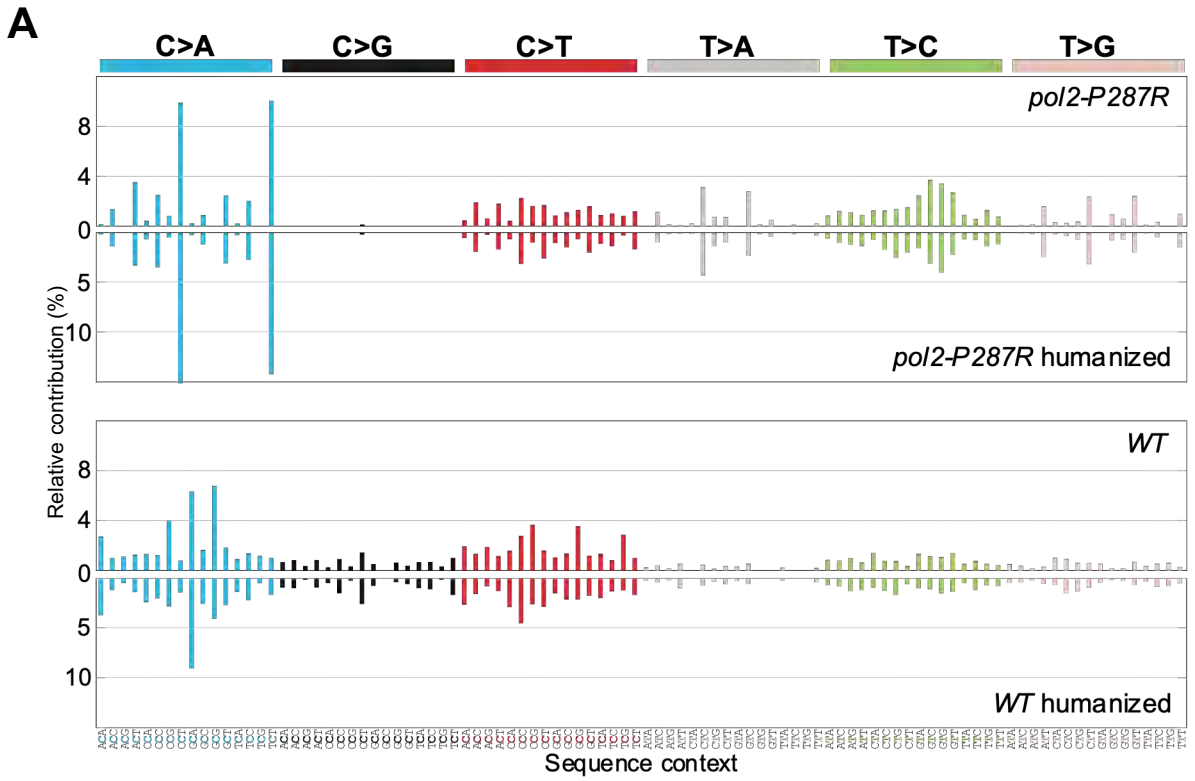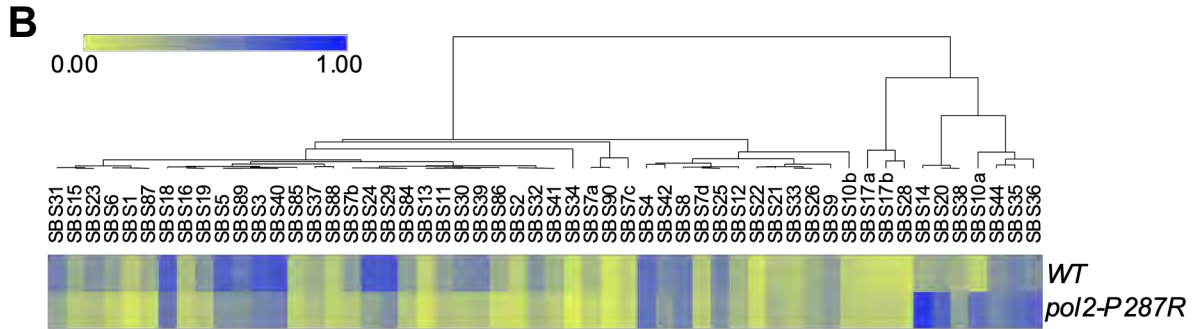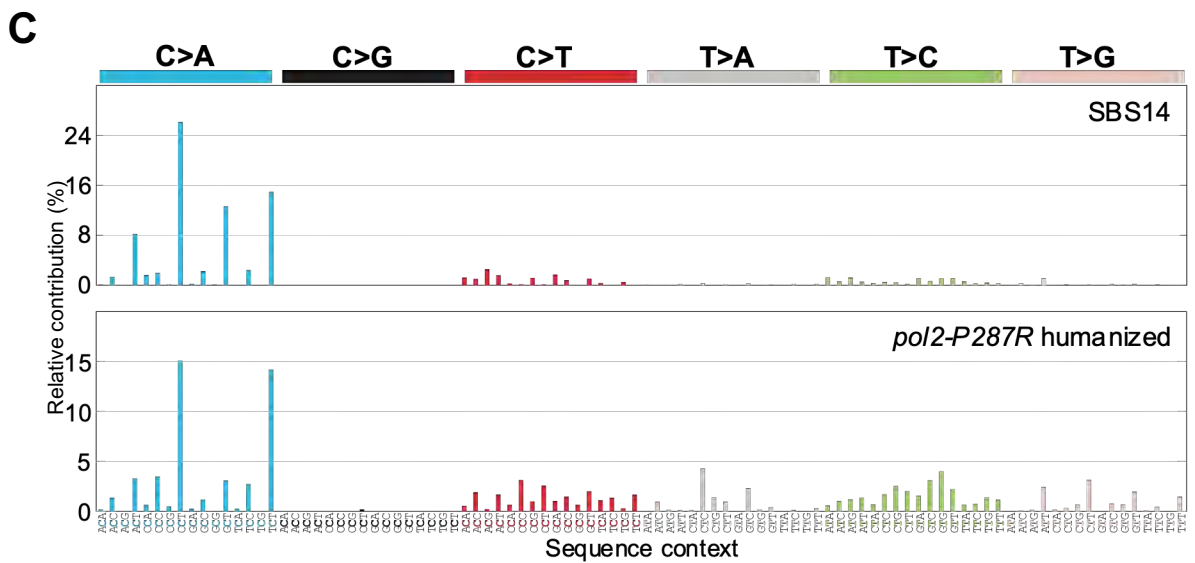

Fig. 3

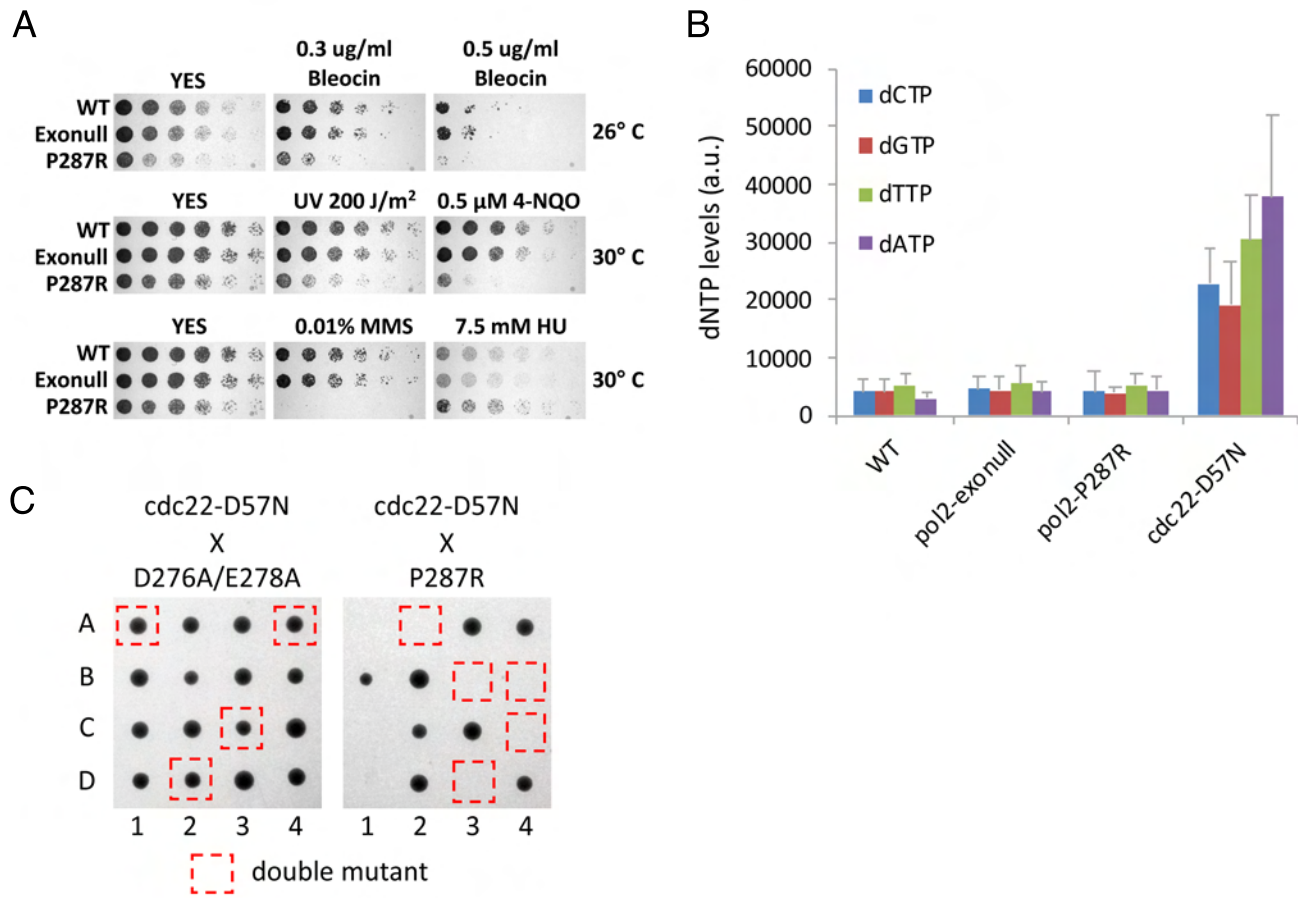



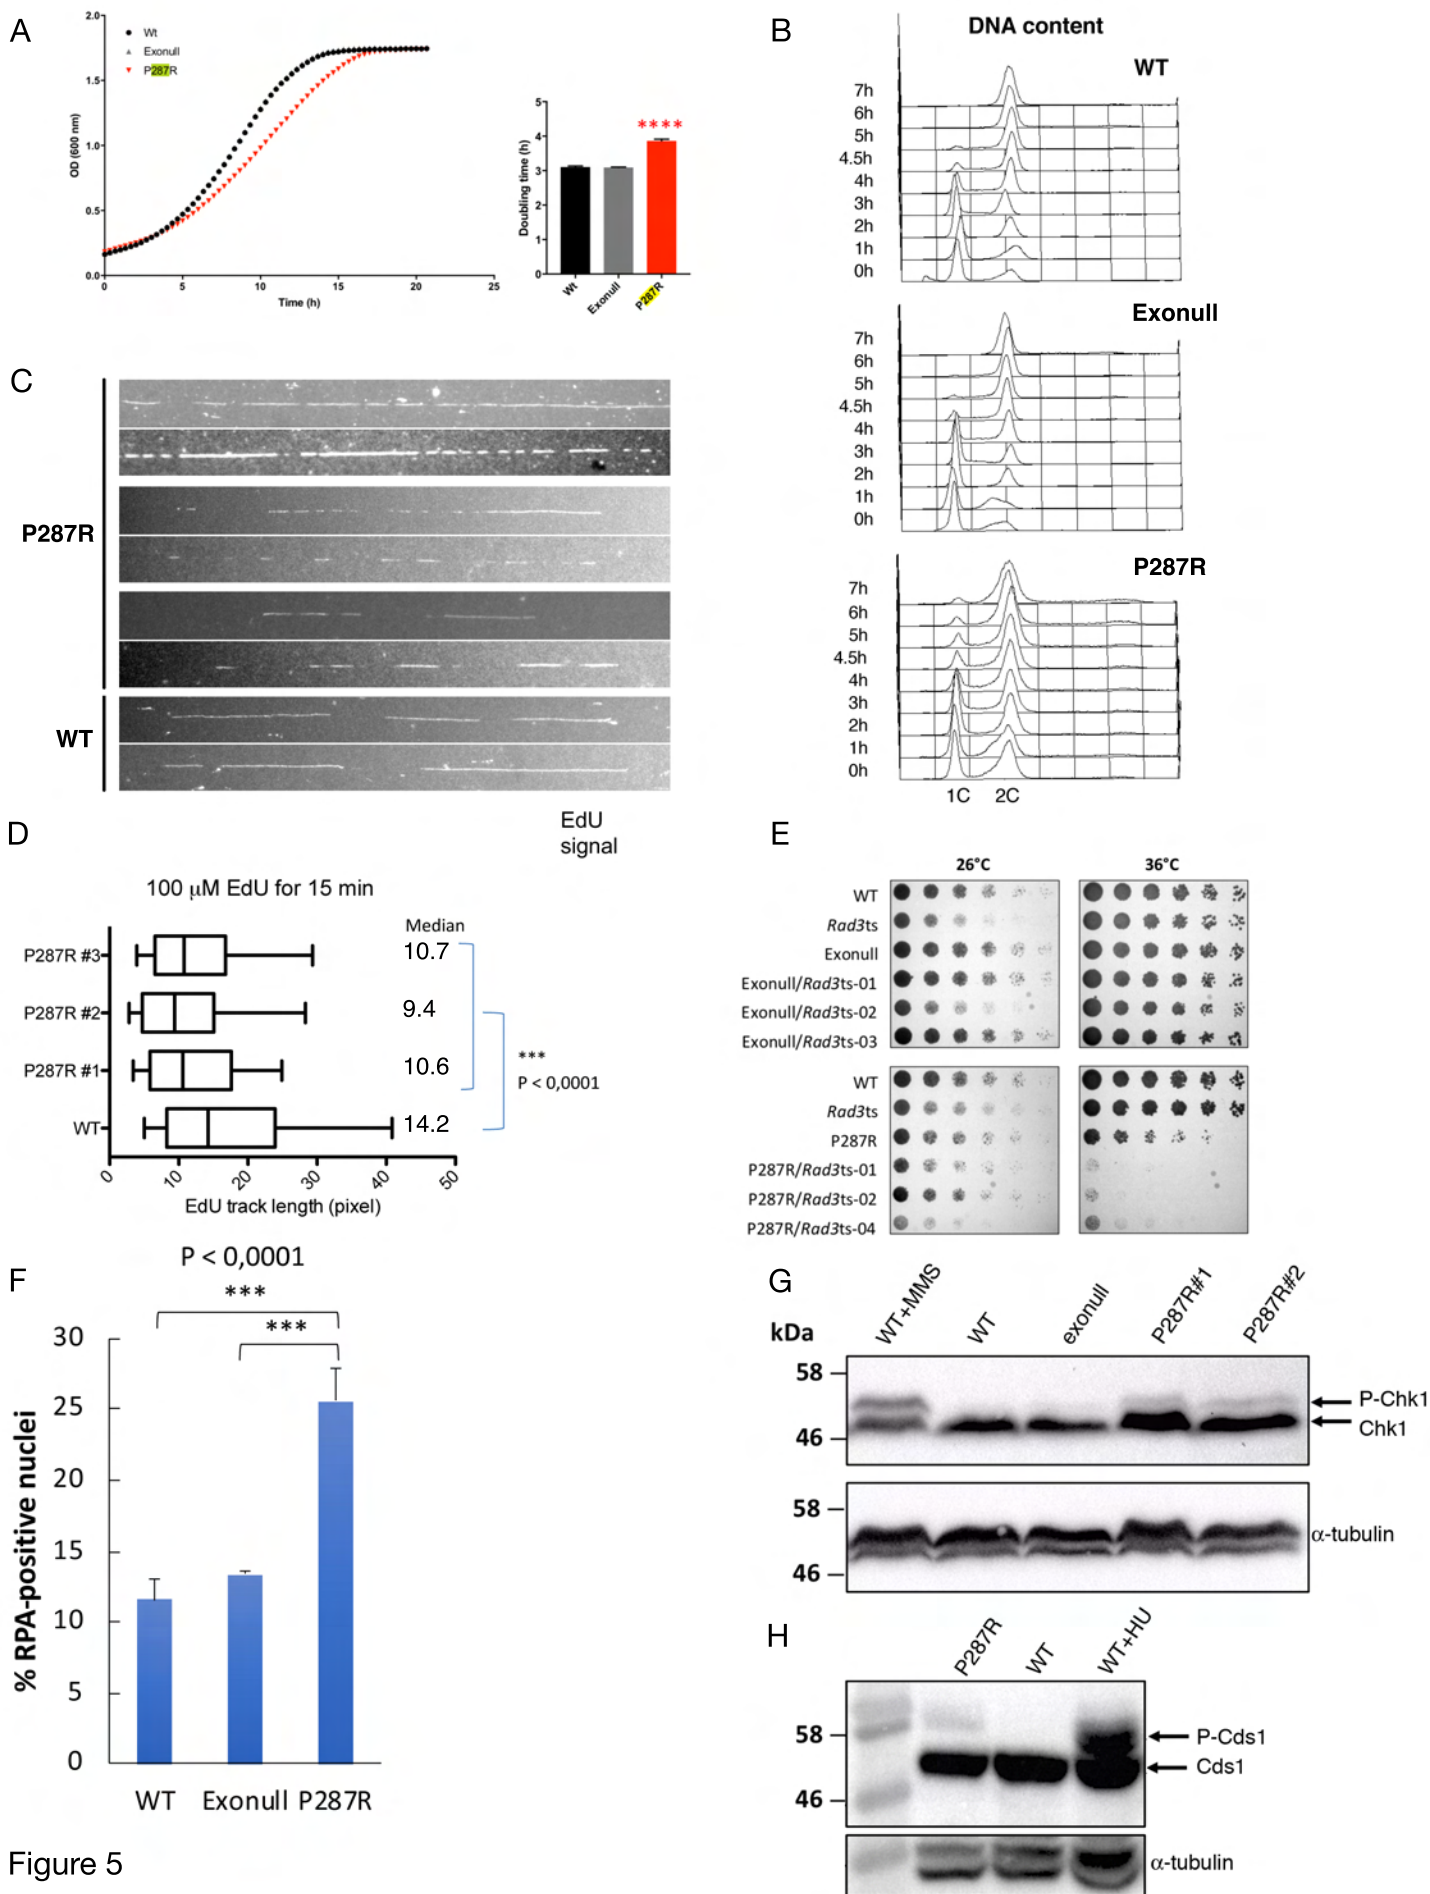

Figure 5

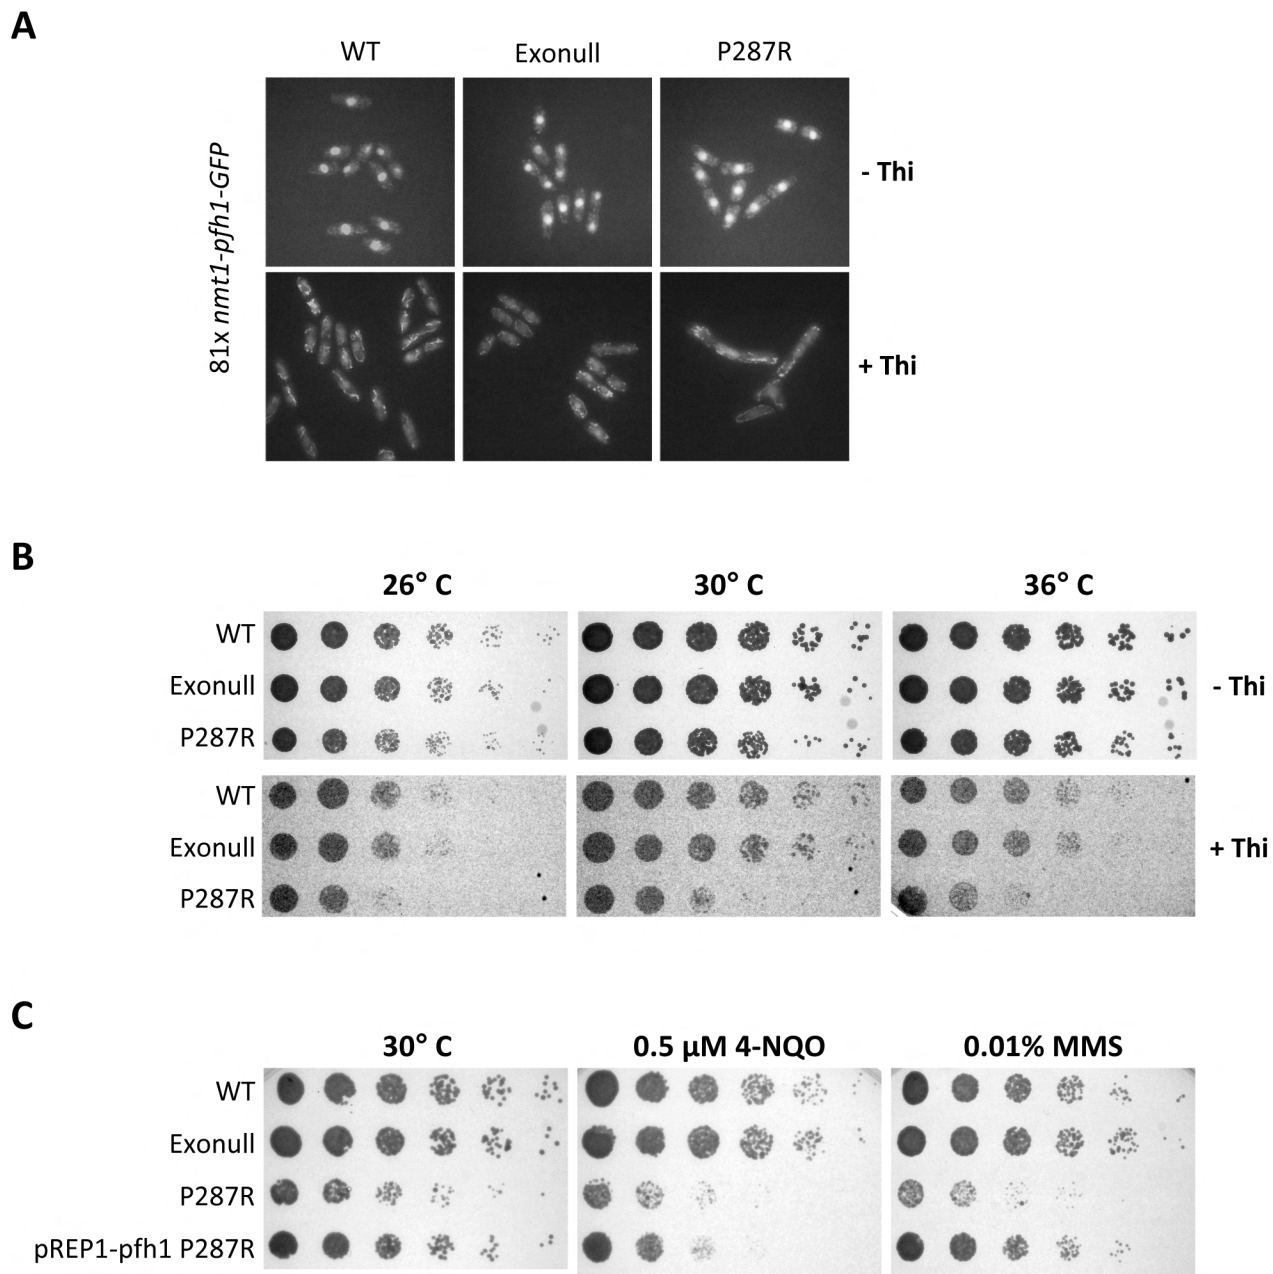

Fig. 6

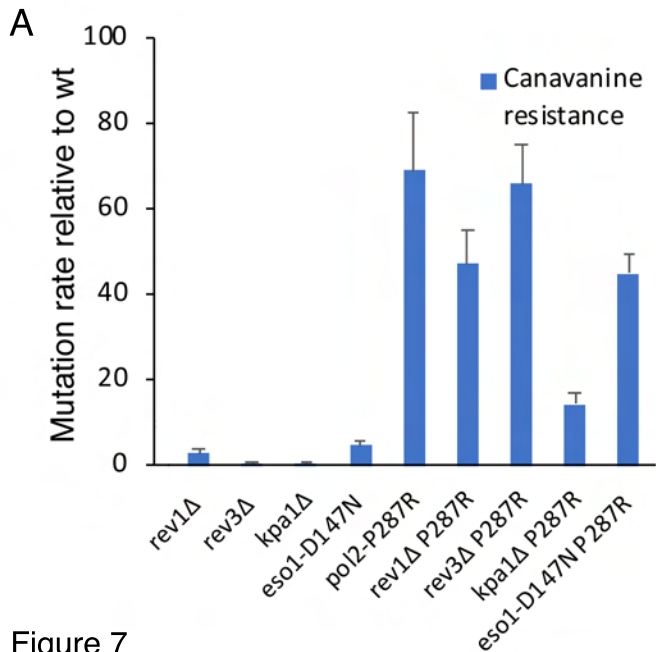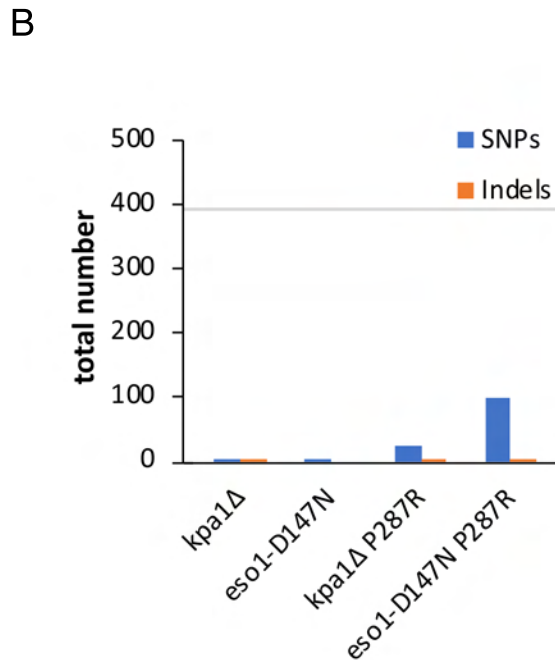

Figure 7
